# Supplementary material for: Antiferromagnetic Cu–Gd interactions through an oxime bridge
Source: Royal Society of Chemistry journal article supplement (doi:10.1039/c4dt01139b), 2014-01-01
Supplement: c4dt01139b1.pdf [file c4dt01139b1.pdf]

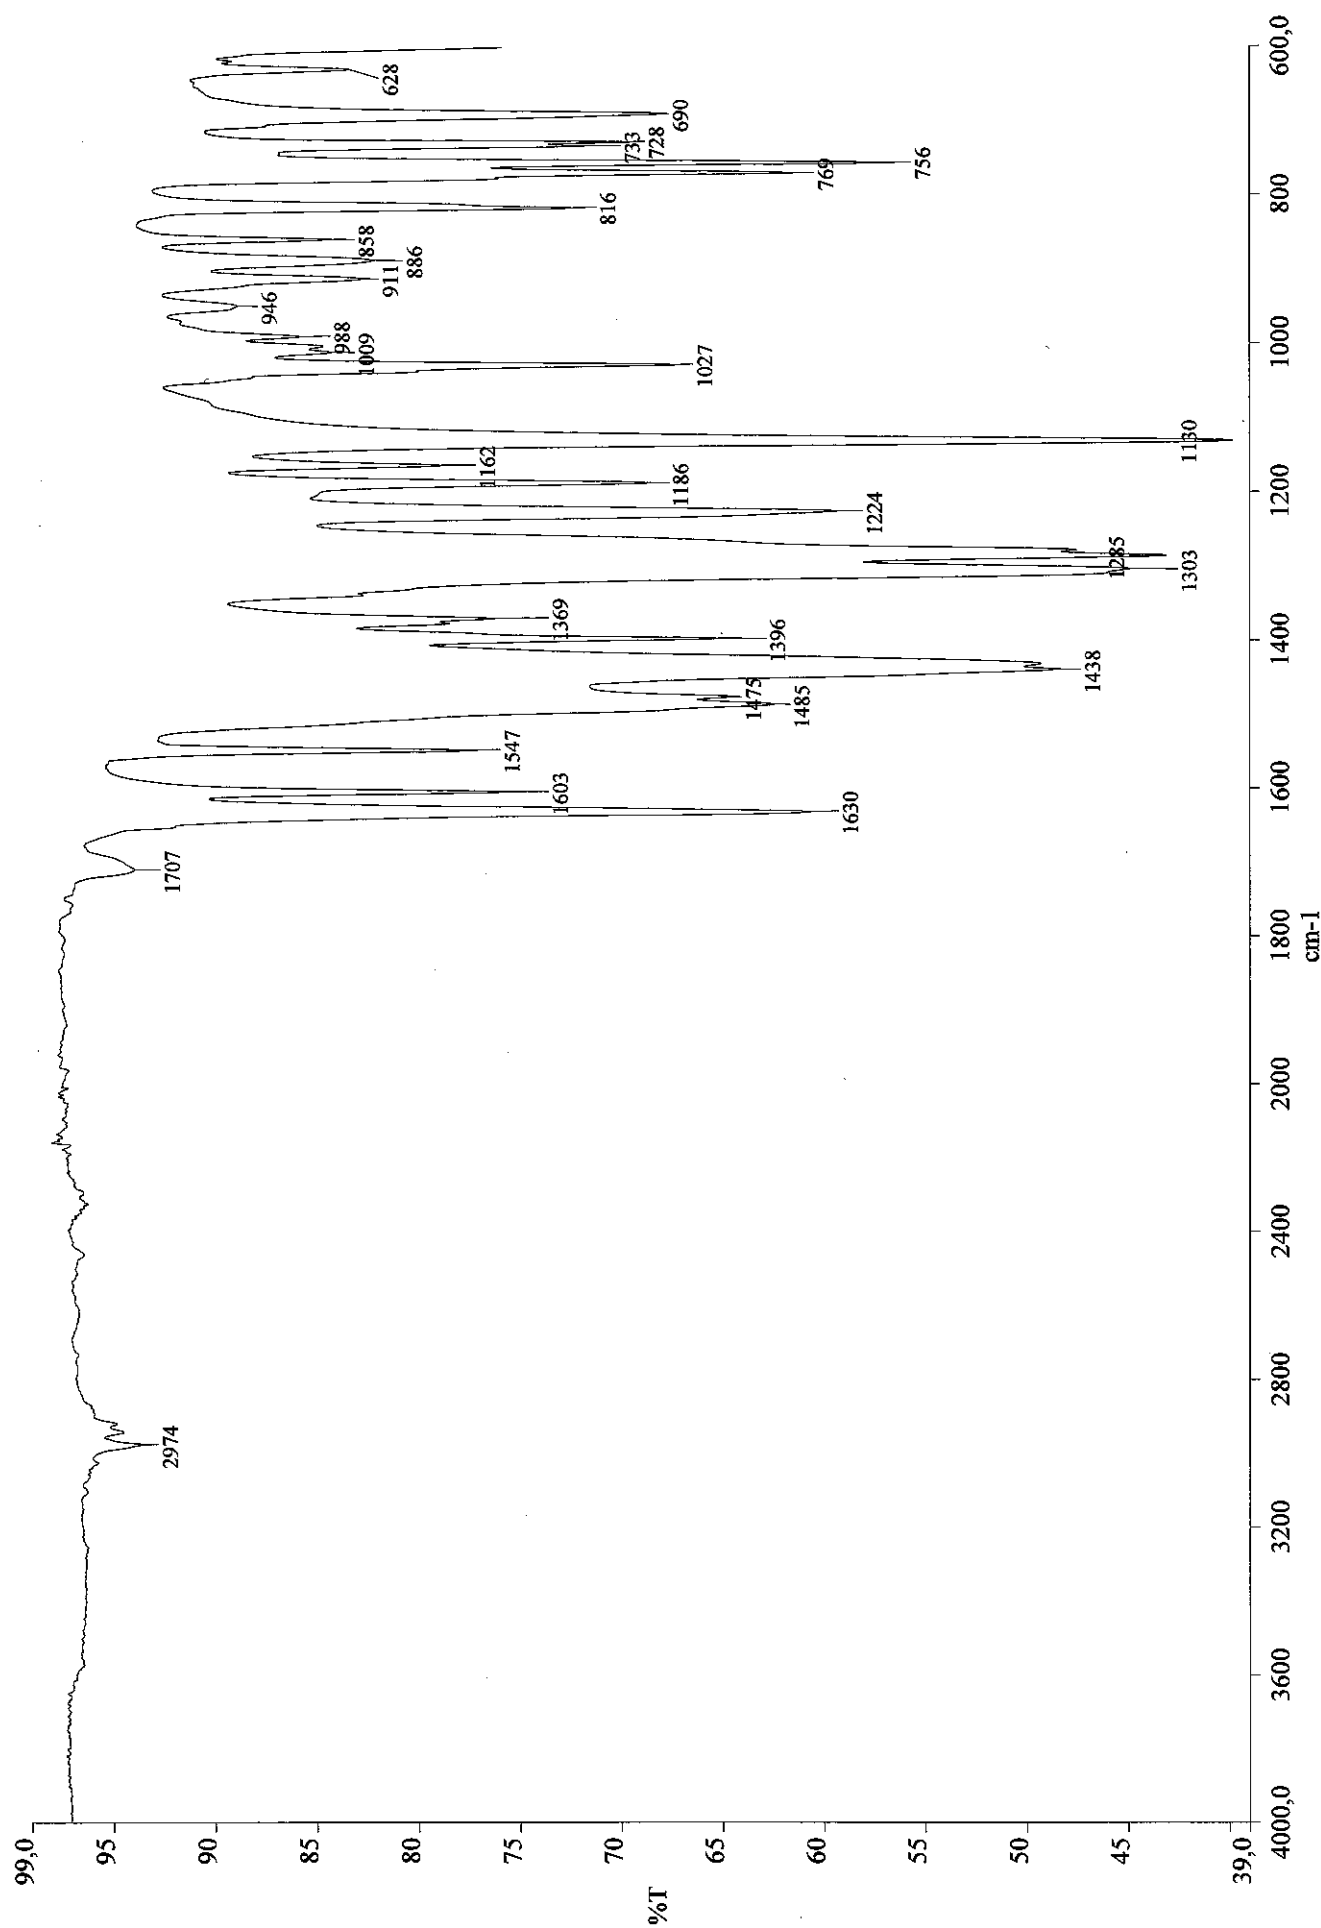

e:\cclequipe\s\costes\2130312.sp - [LaCu)2La(NO3)3]

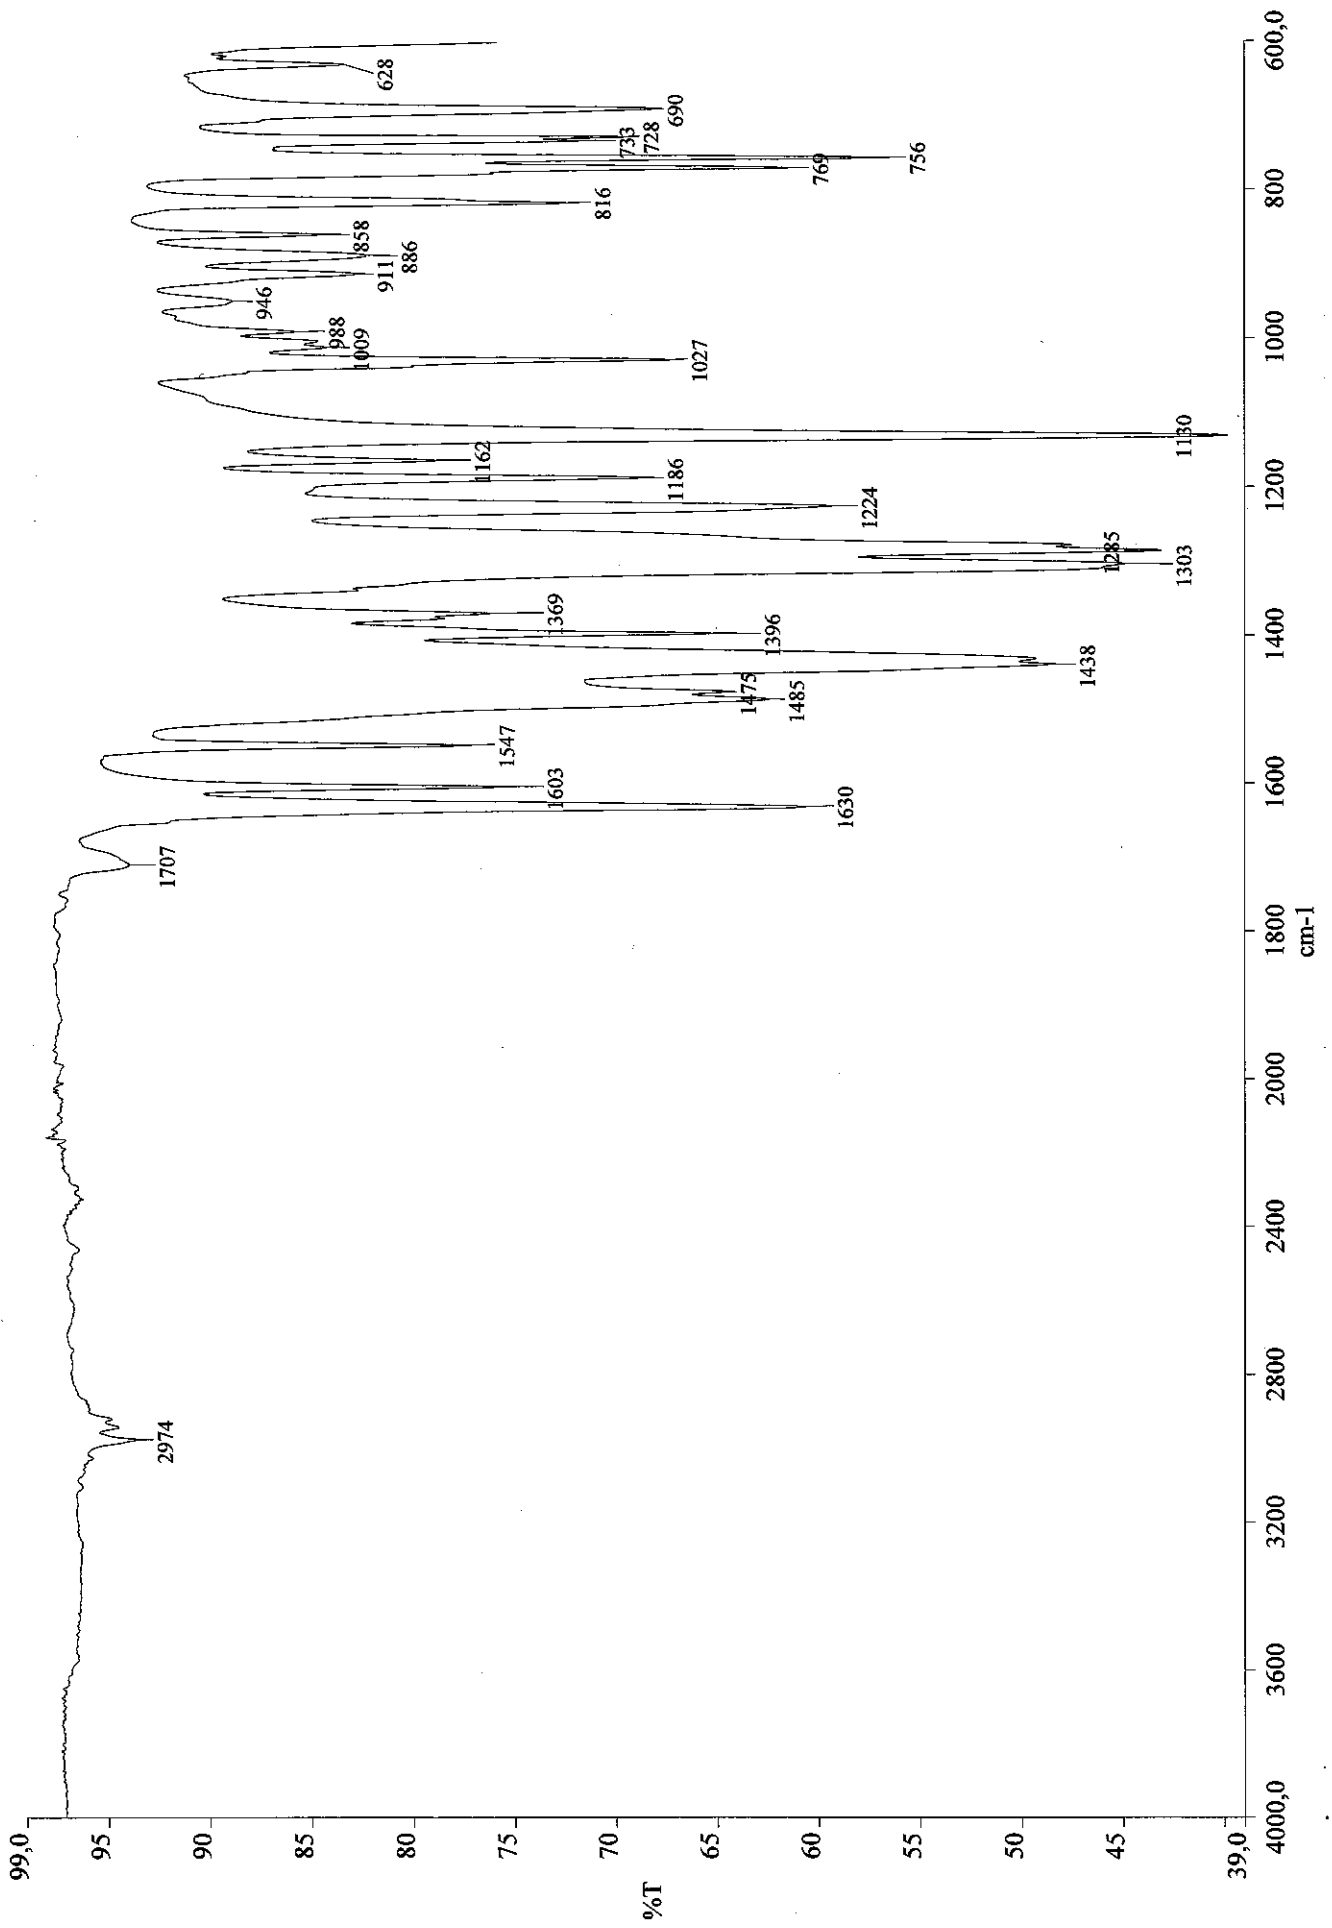

e:\cclequipe s\costes\2130312.sp - [LCu]2La(NO3)3

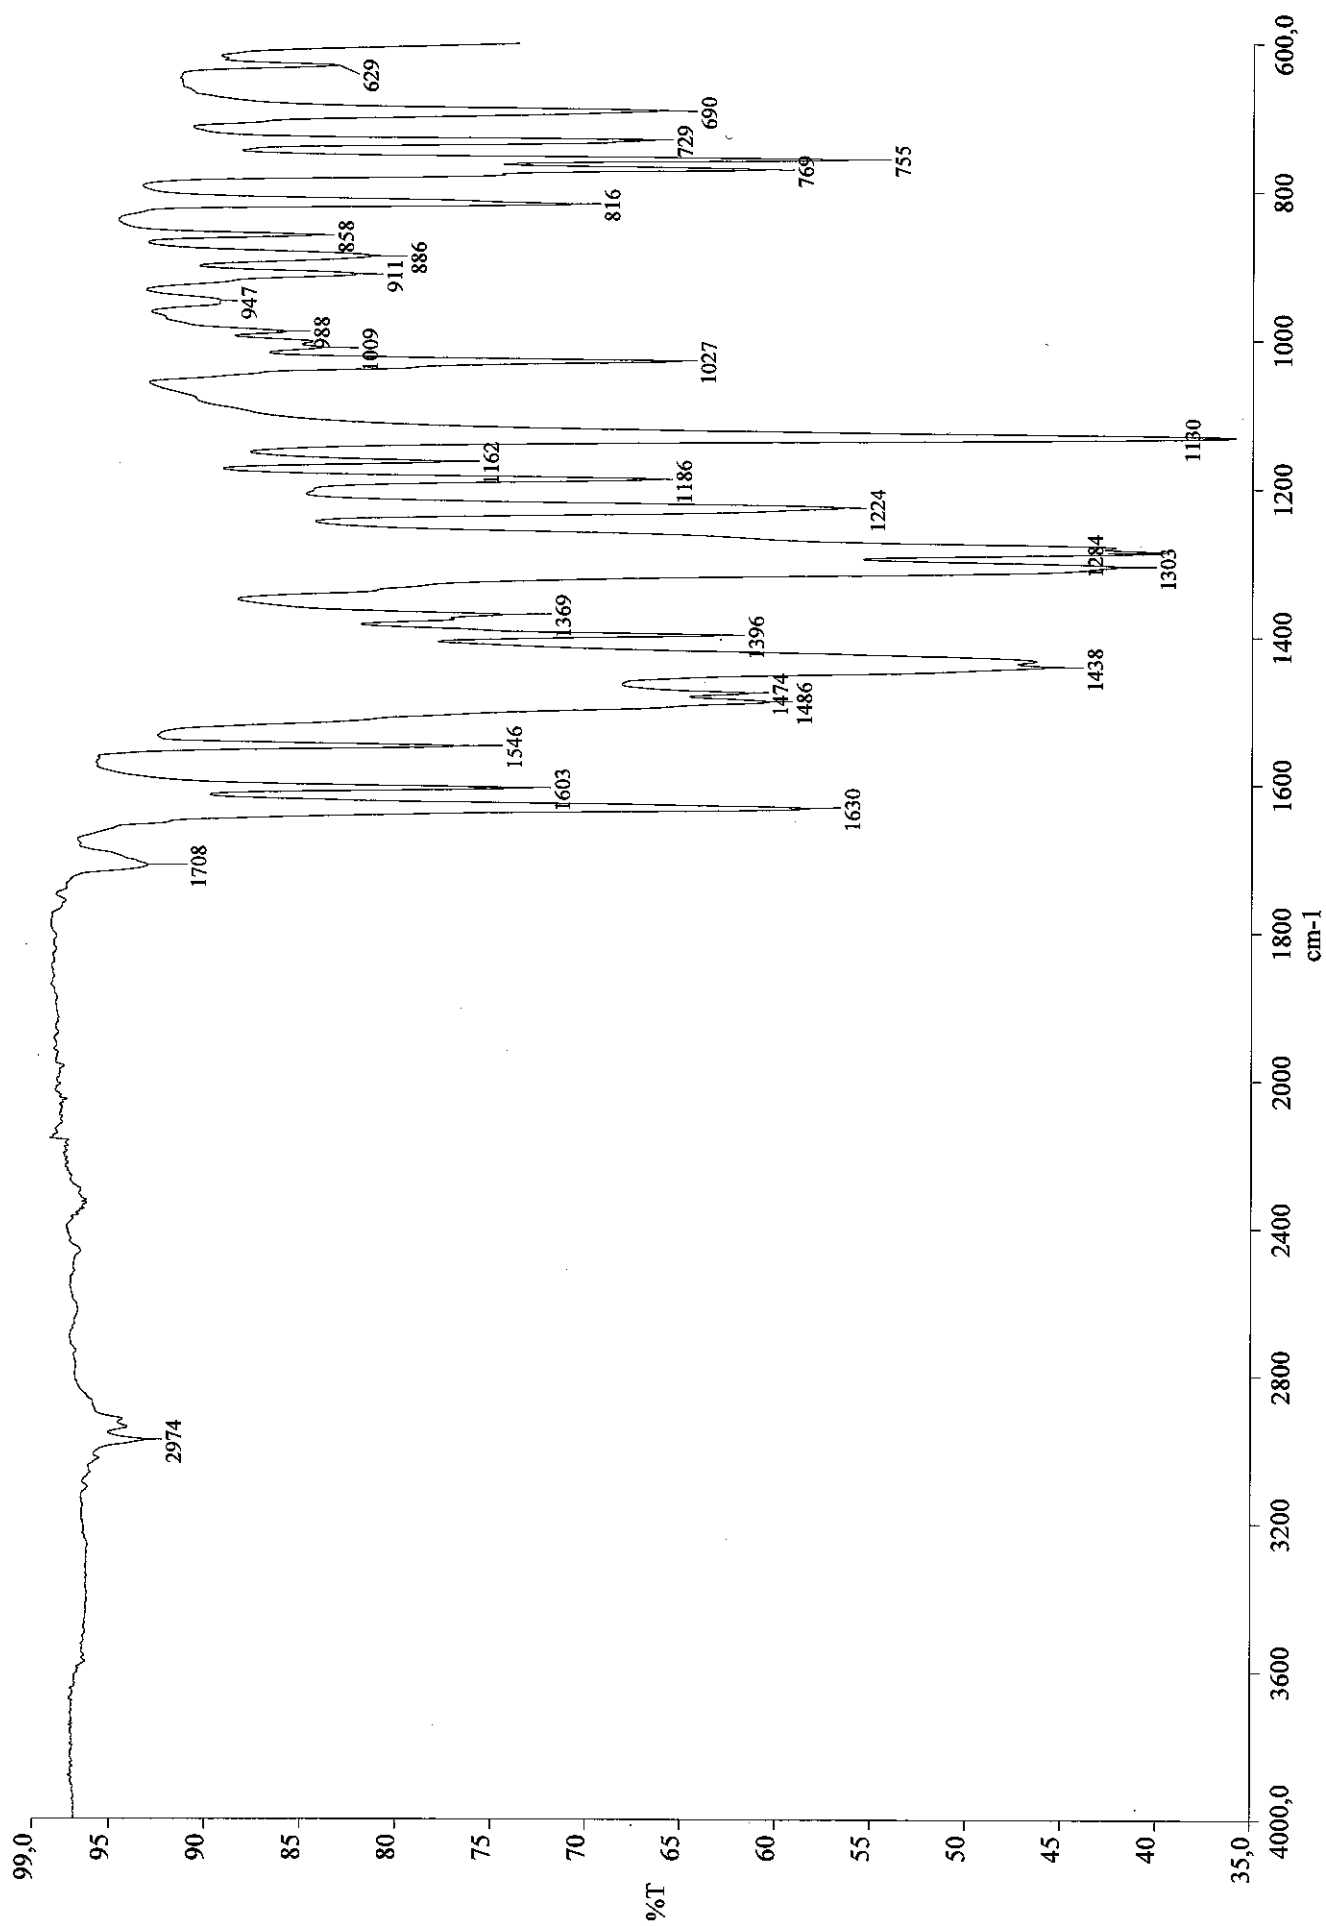

e:\cclequipe\scostes\1050312.sp - [(L(Cu)2Ce(NO3)3]

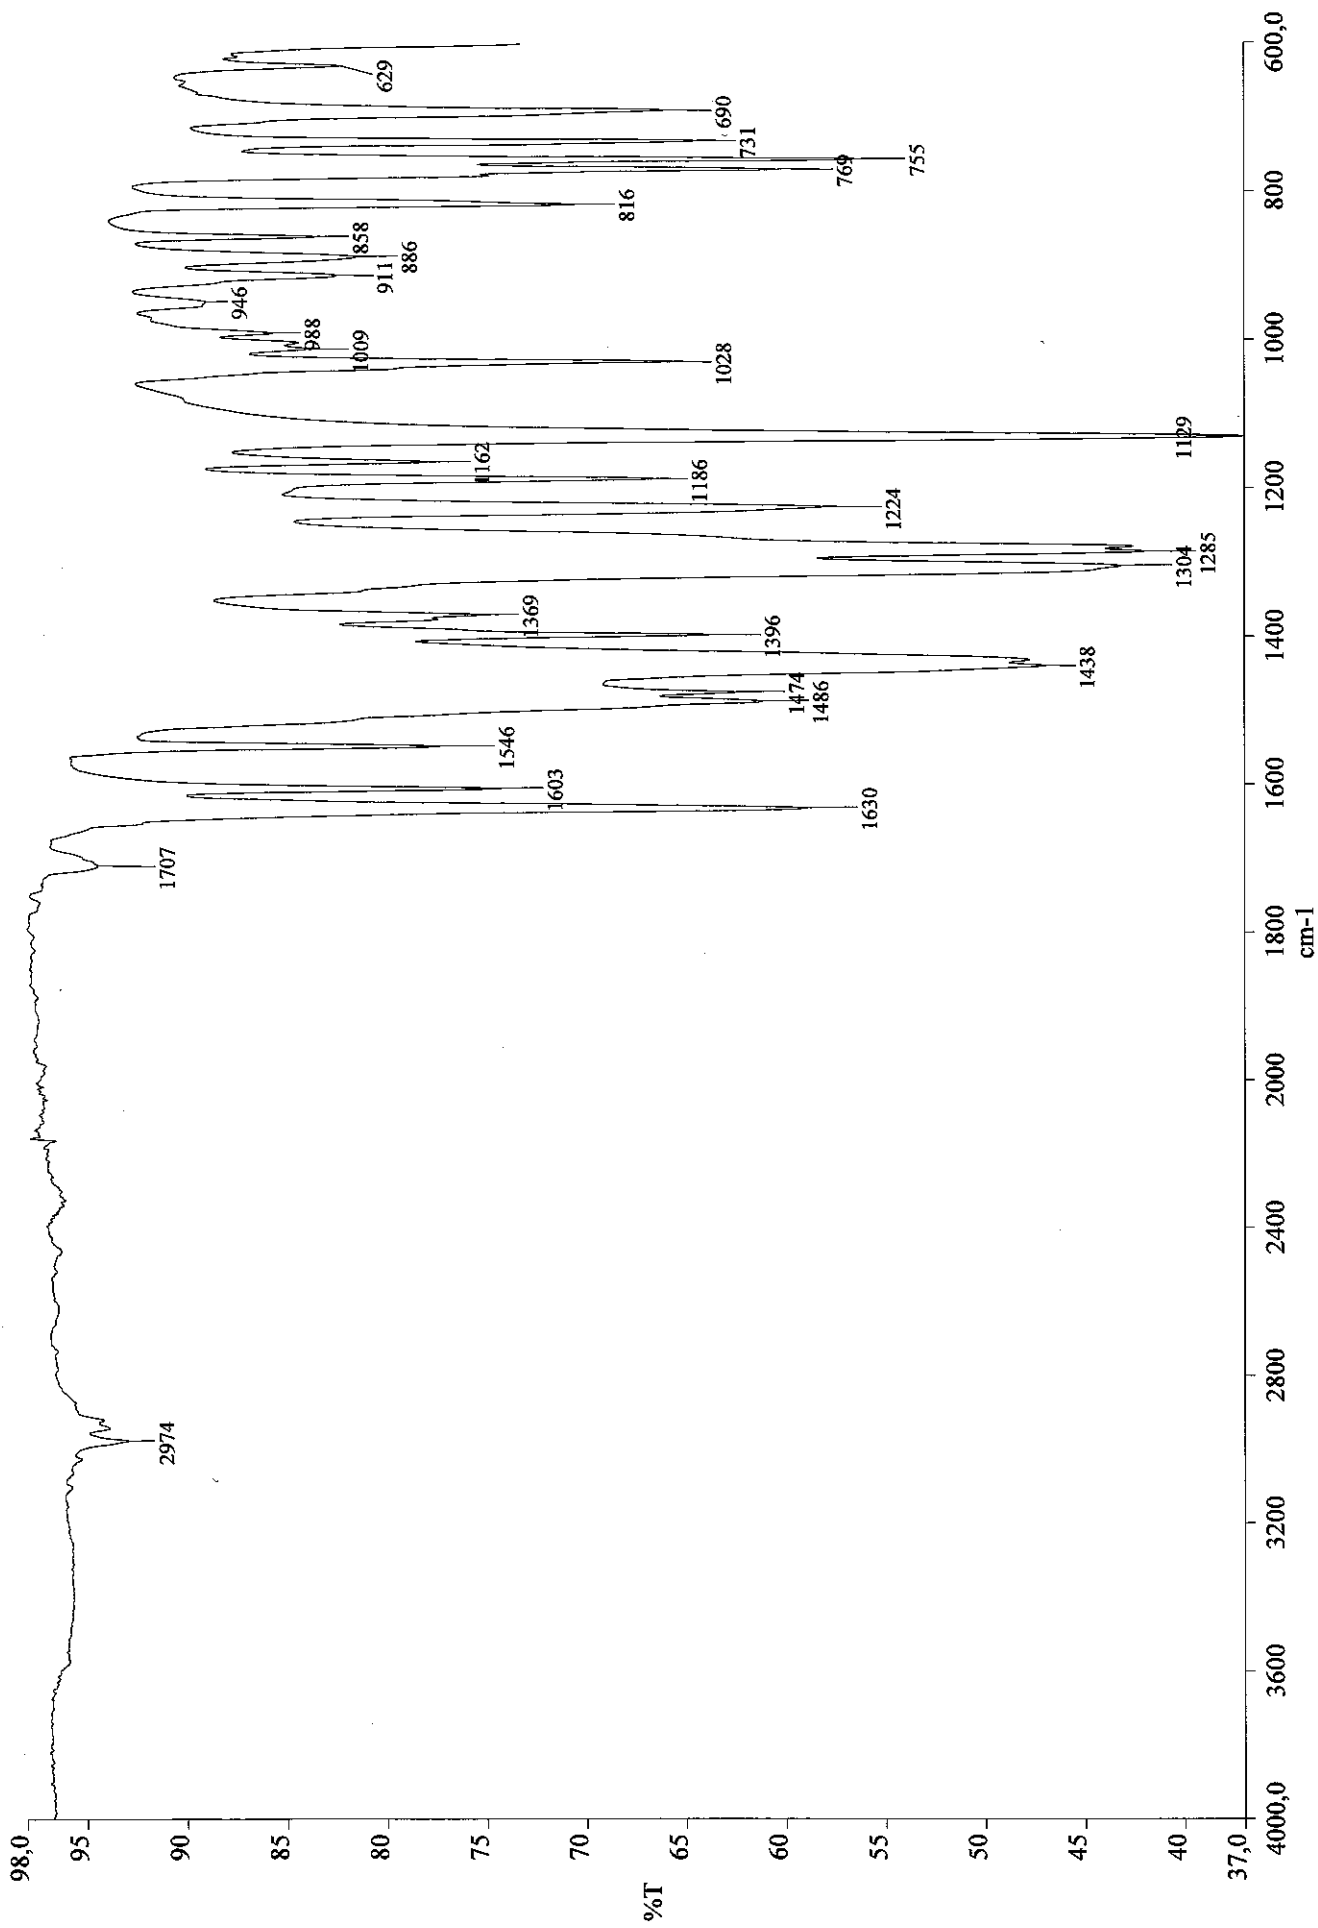

e:\cclequipe s\costes\2261011.sp - [(LCu)2Pr(NO3)3]

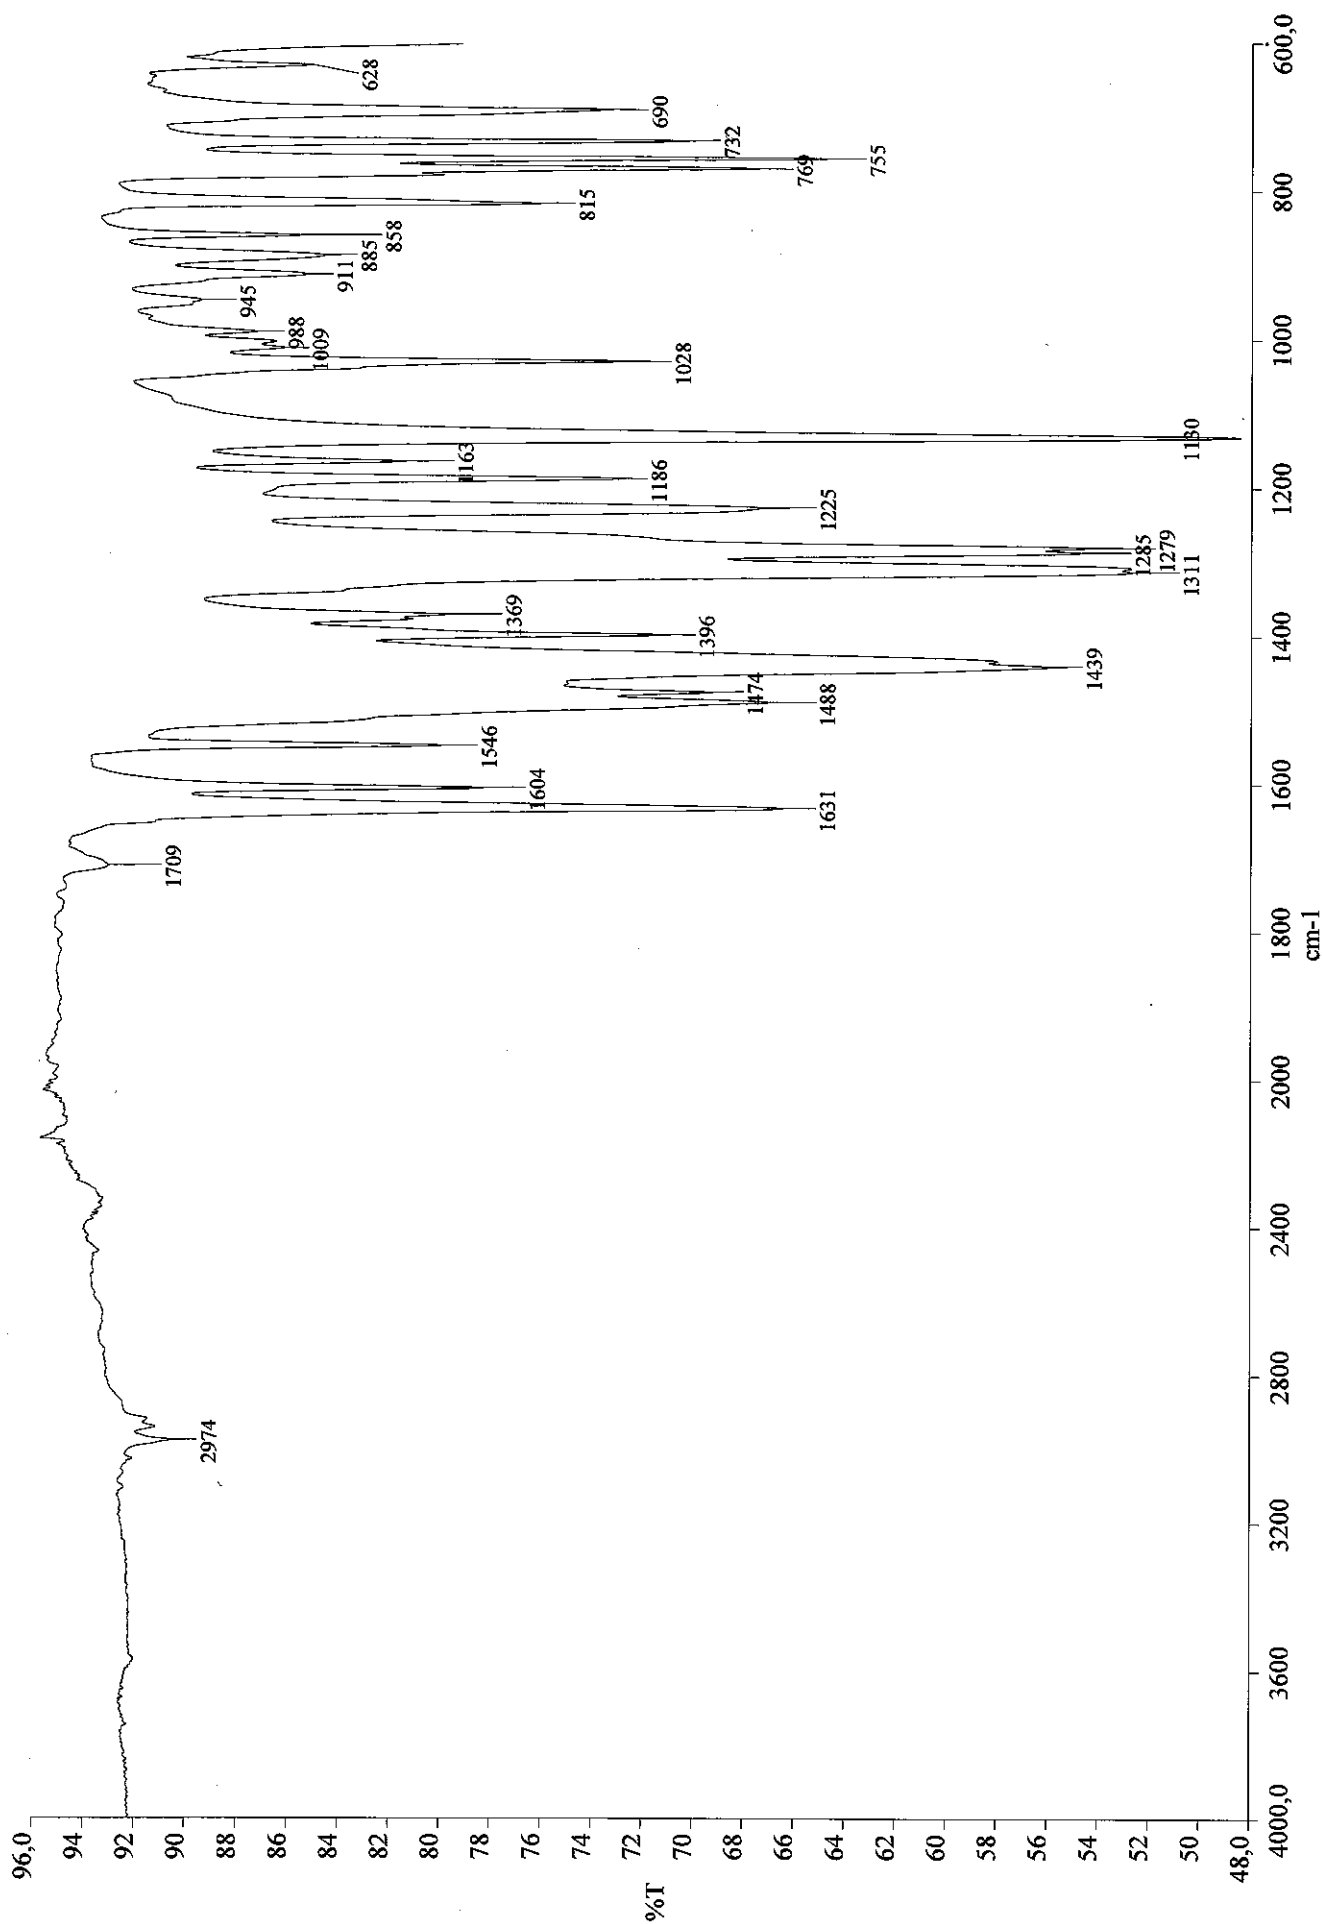

e:\cctlequipe s\costes\7020312.sp - [(LCu)2Nd(NO3)3]

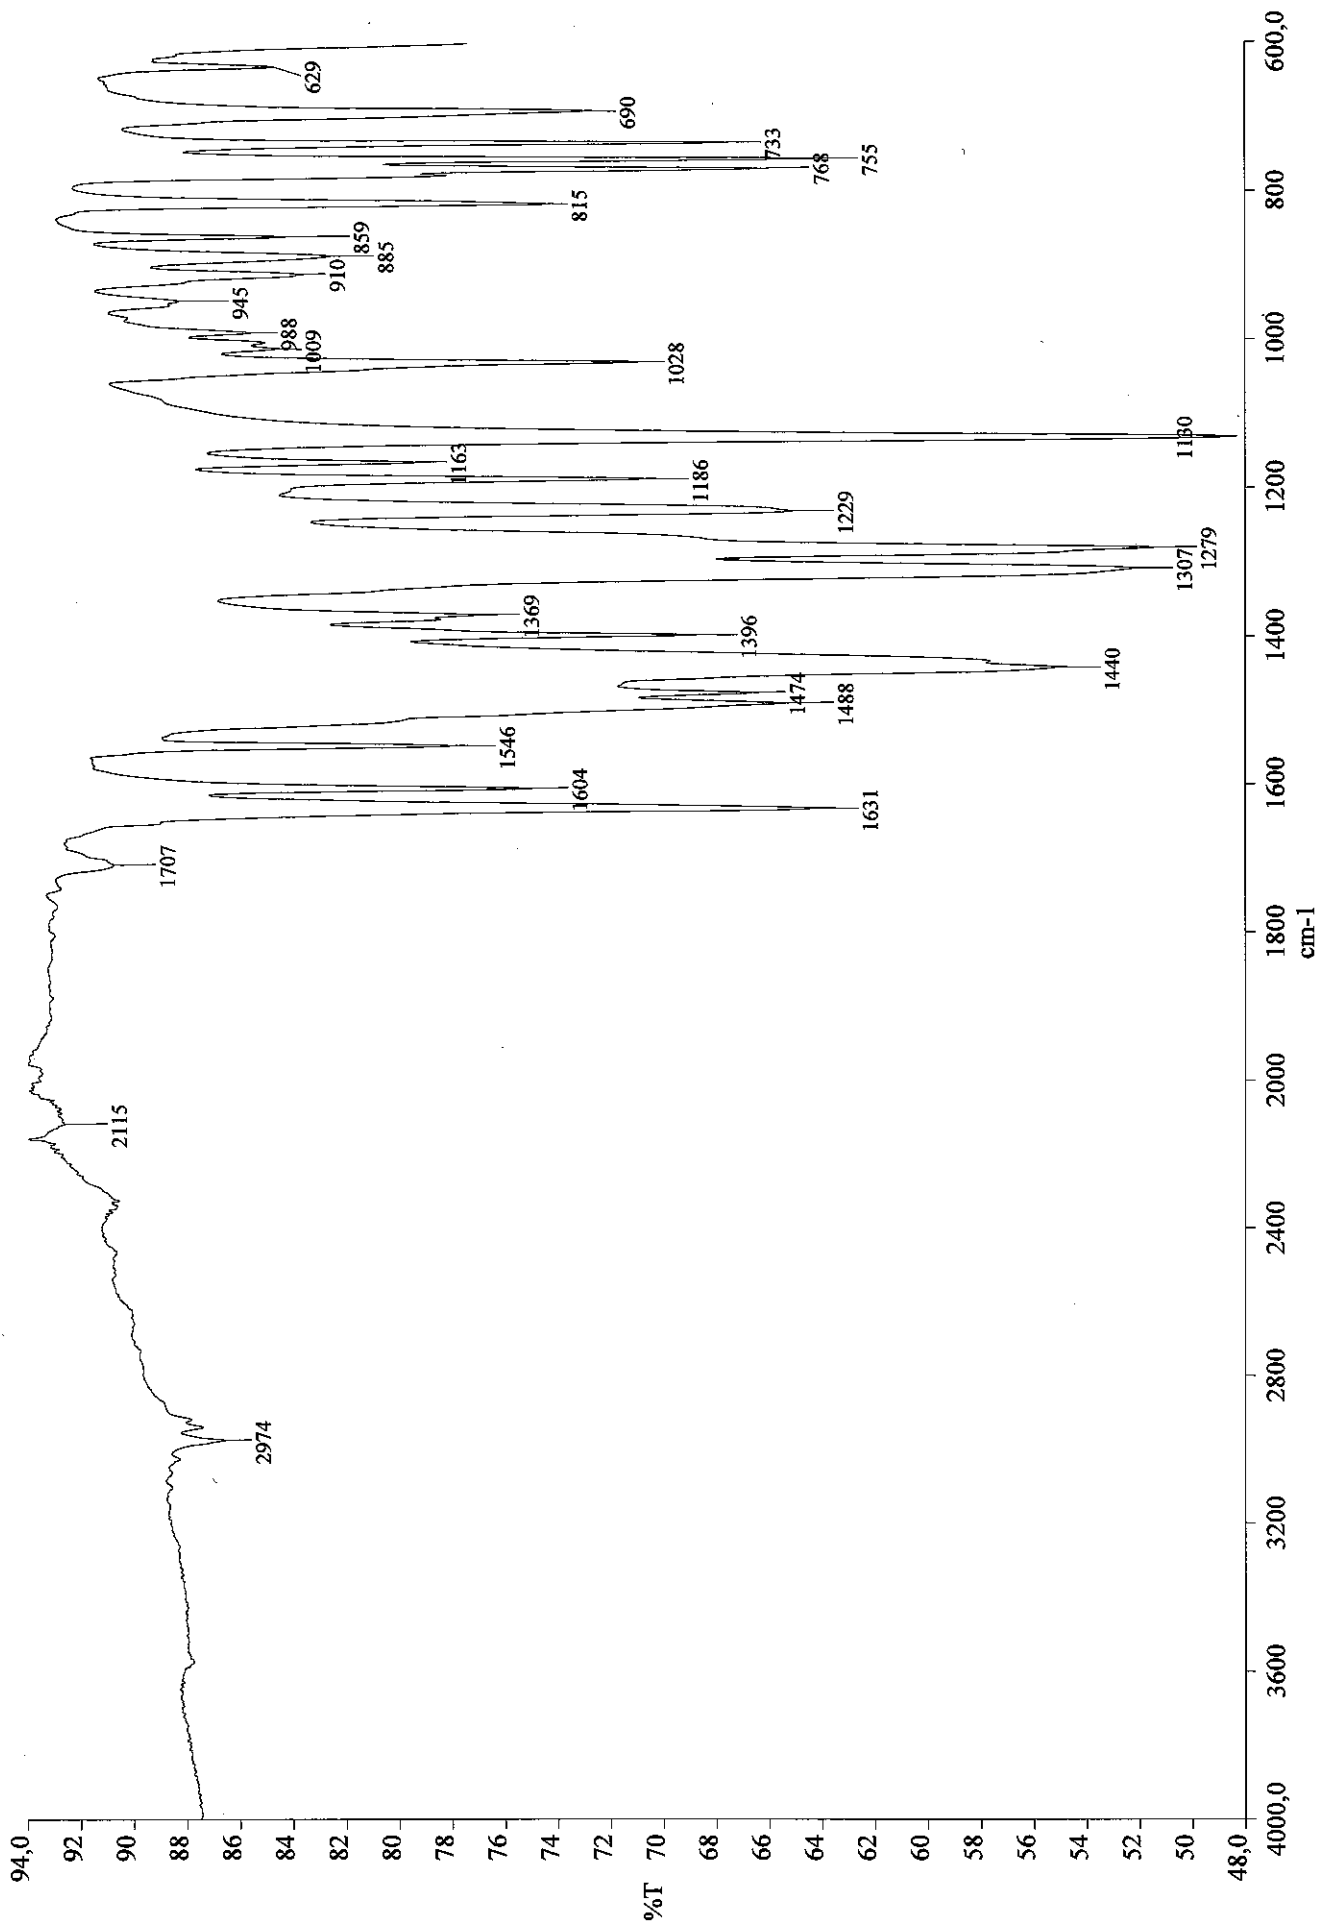

e:\cclequipe s\costes\6020312.sp - [(LCu)2Sm(NO3)3]

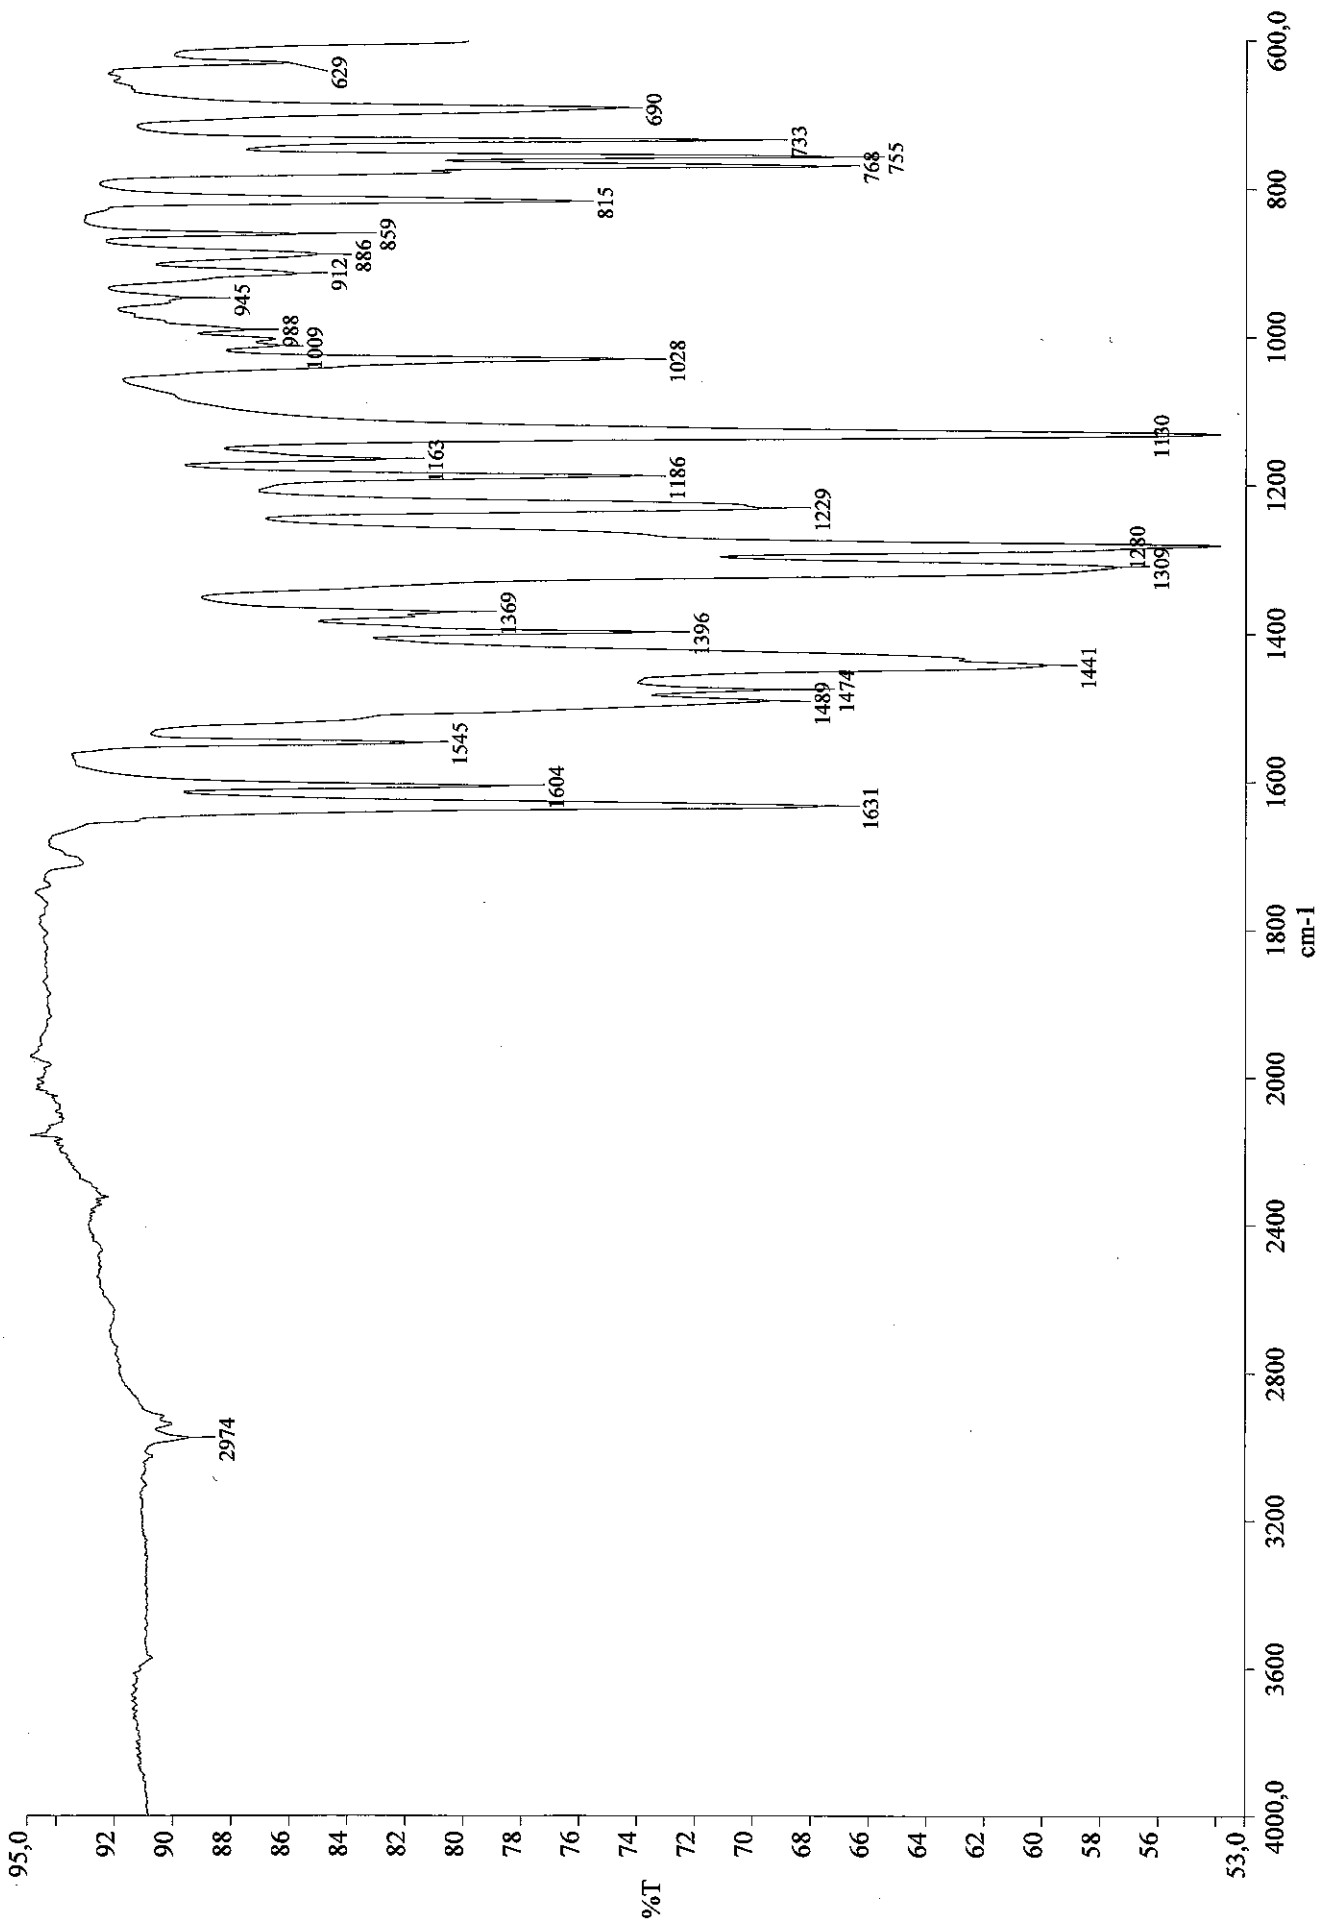

e:\lcclequipe\scosfes\8020312.sp - [(L-Cu)2Eu(NO3)3]

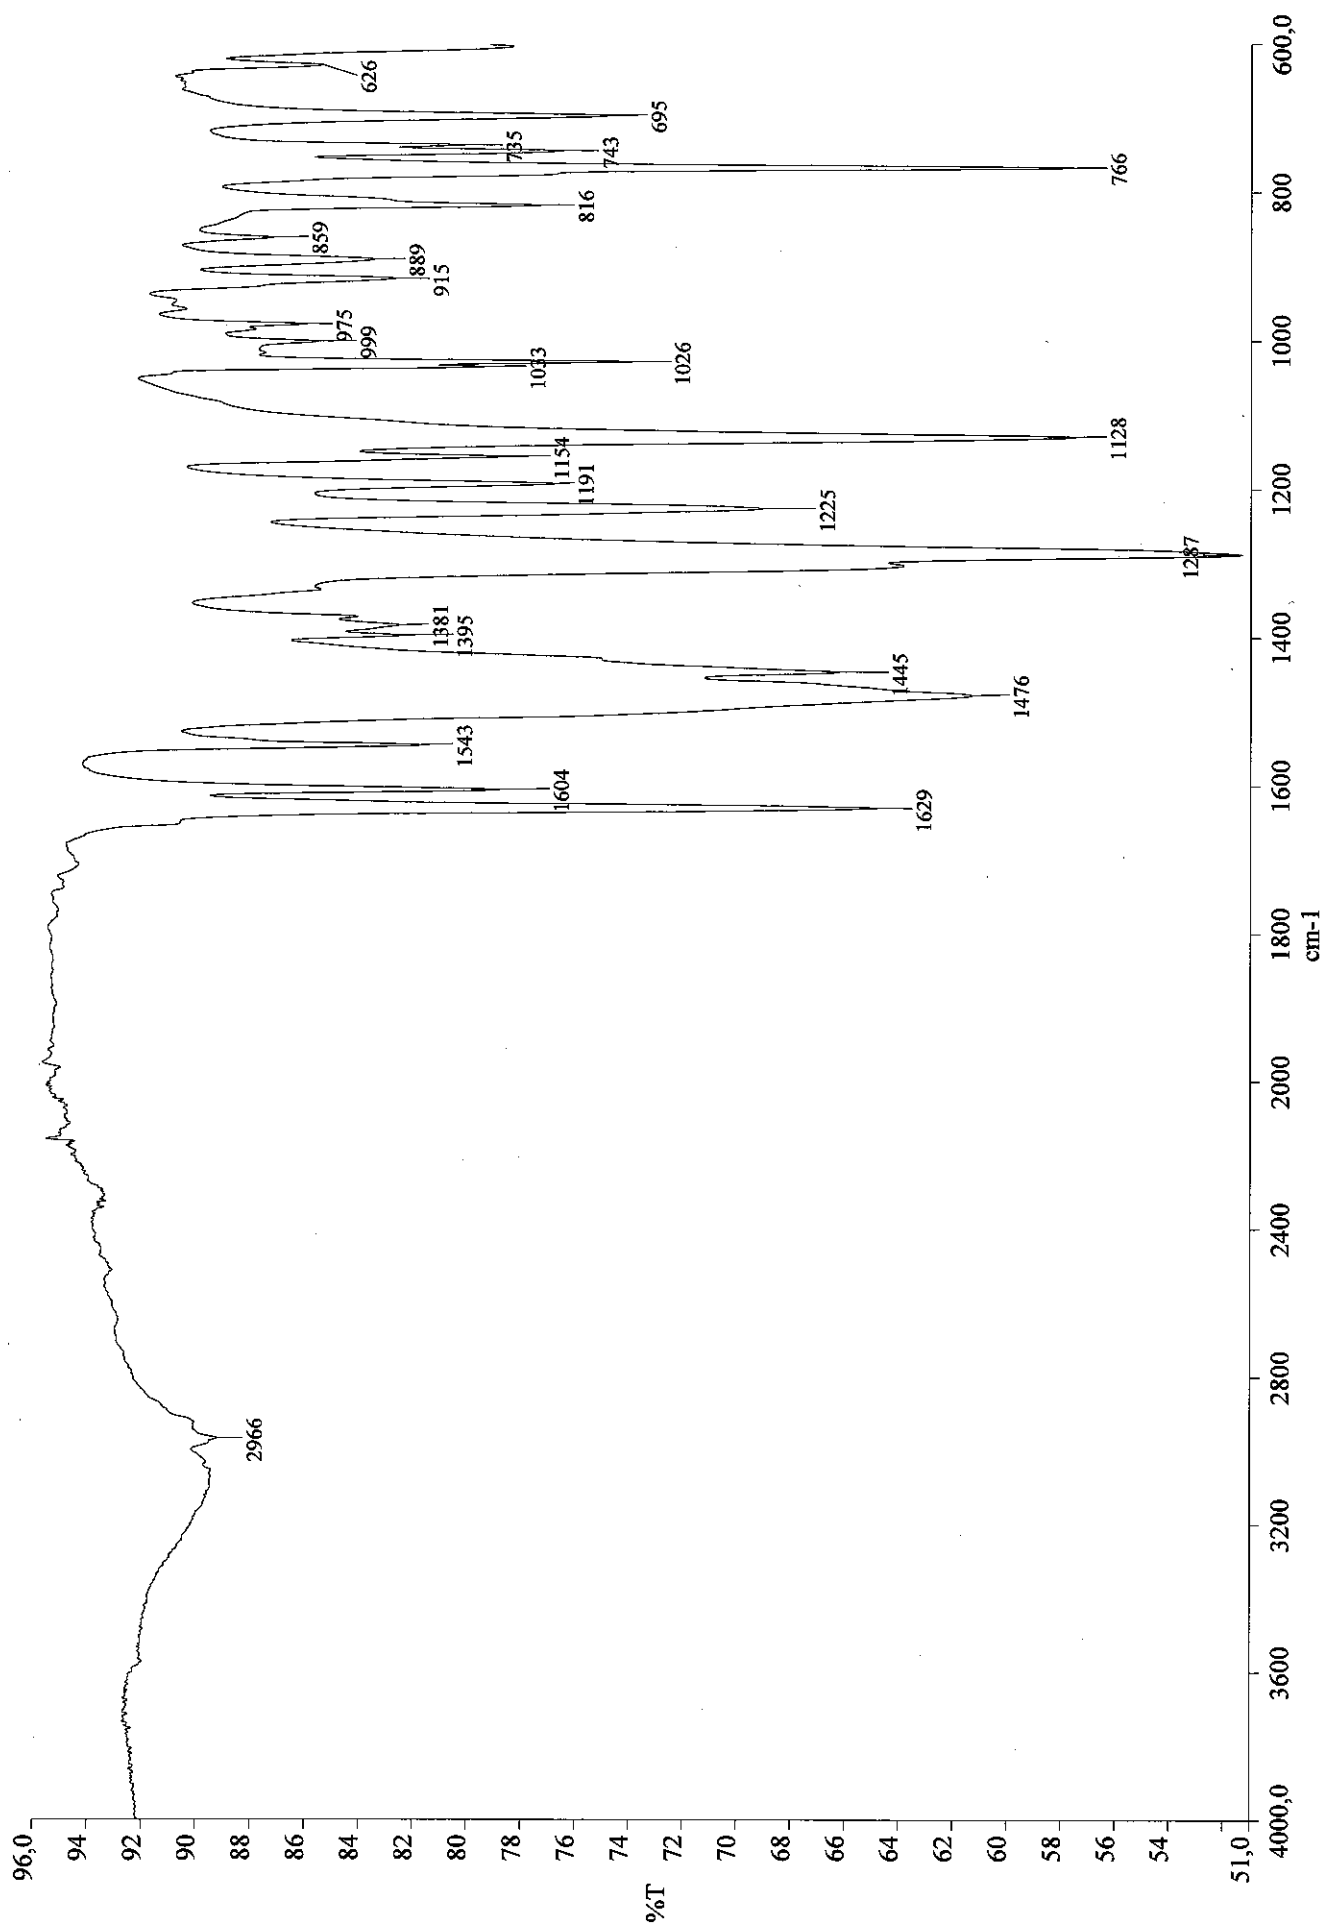

e:\lcclequpe stcostes\5020312.sp - [(LCu)2Gd(NO3)3(H2O)]



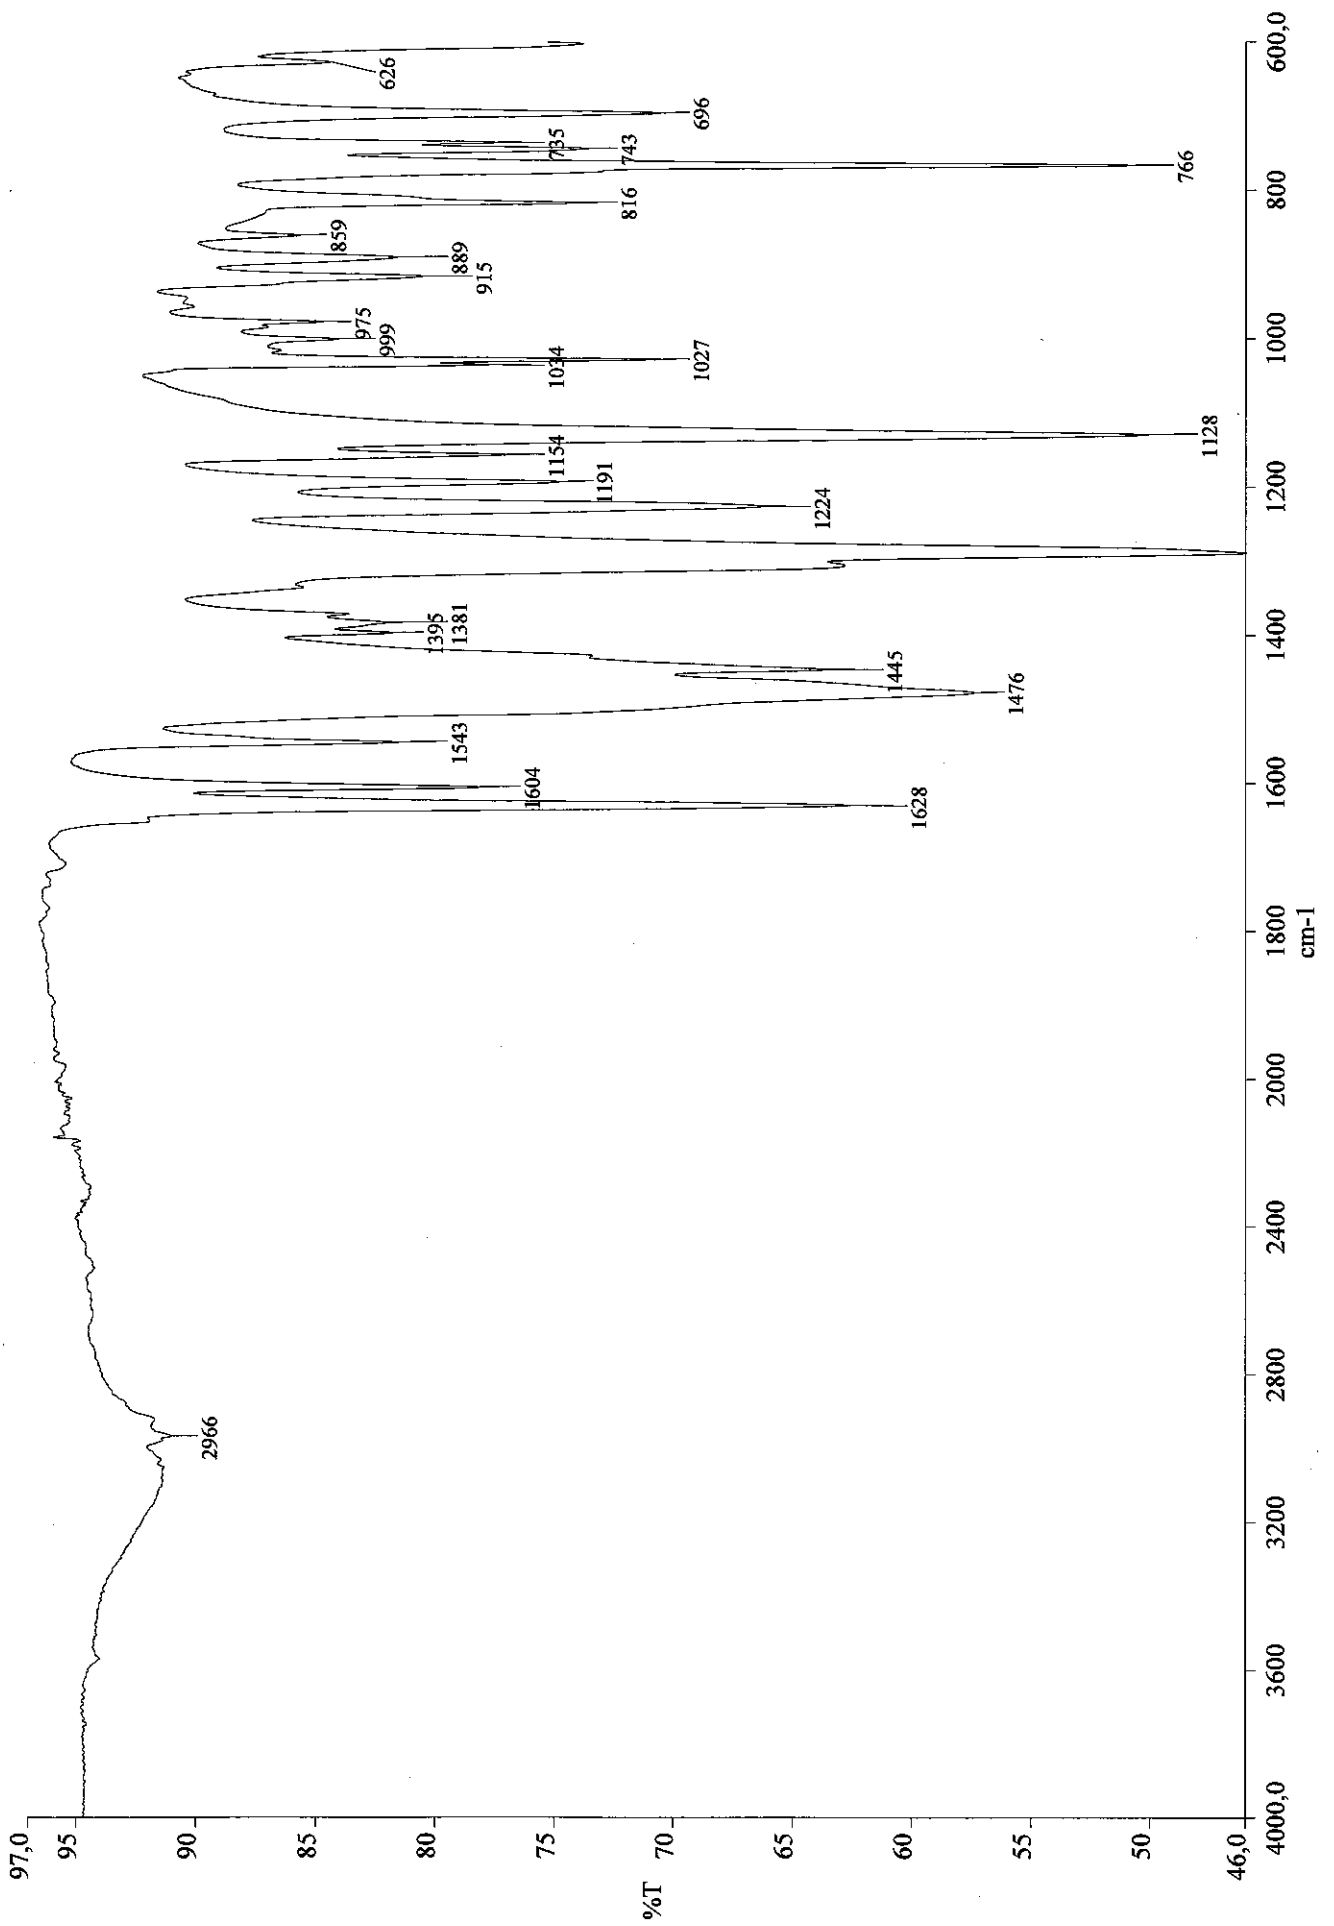

e:\lcc\lequipe s\cosfes\2050312.sp - [(LCu)2Tb(NO3)3(H2O)]

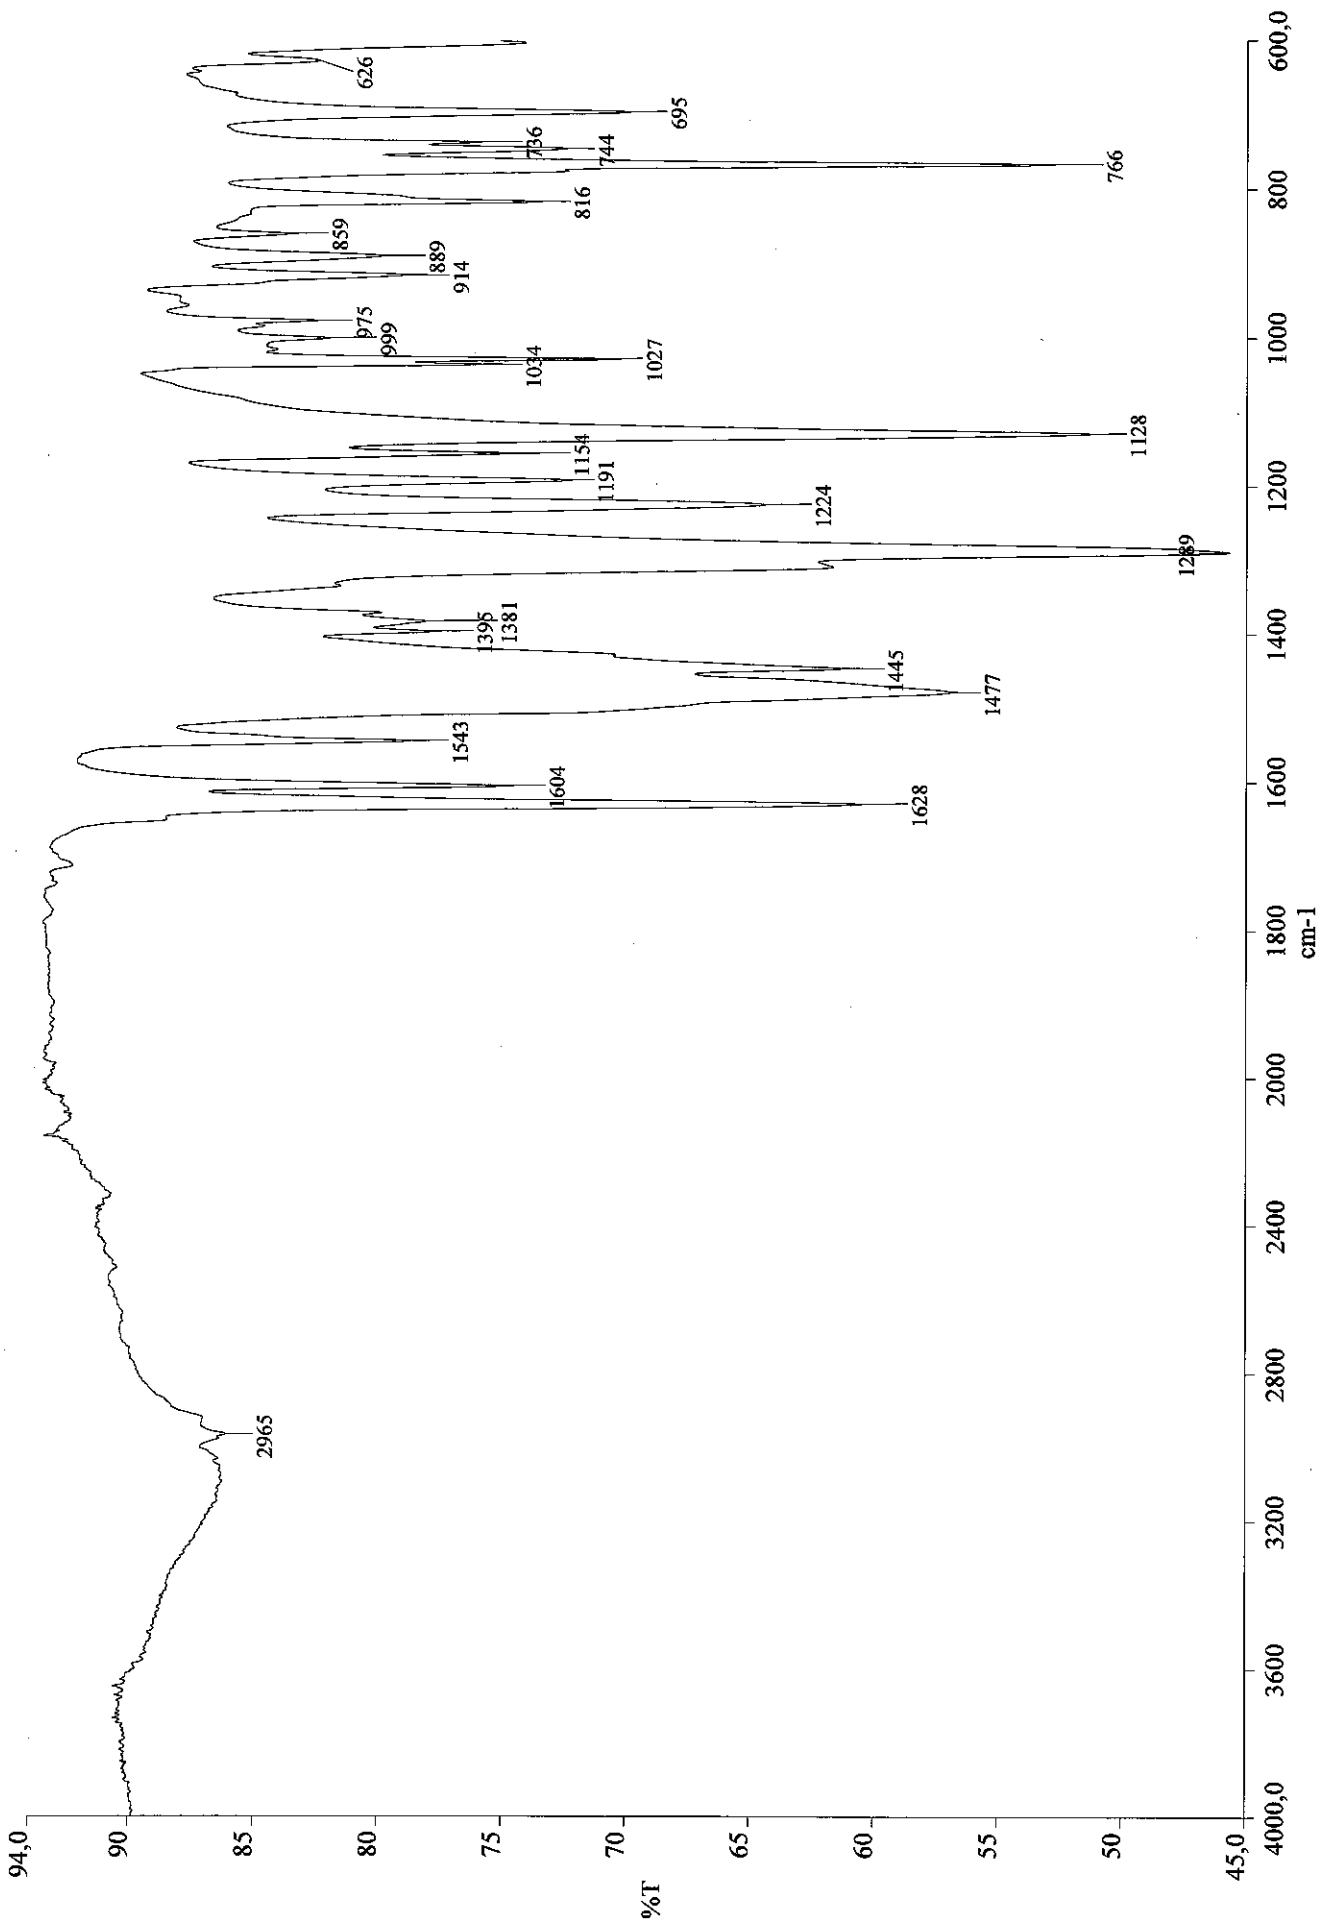

e:\lcc\lequipe stcostes\2100913.sp - [(LCu)2Dy(NO3)3(H2O)]

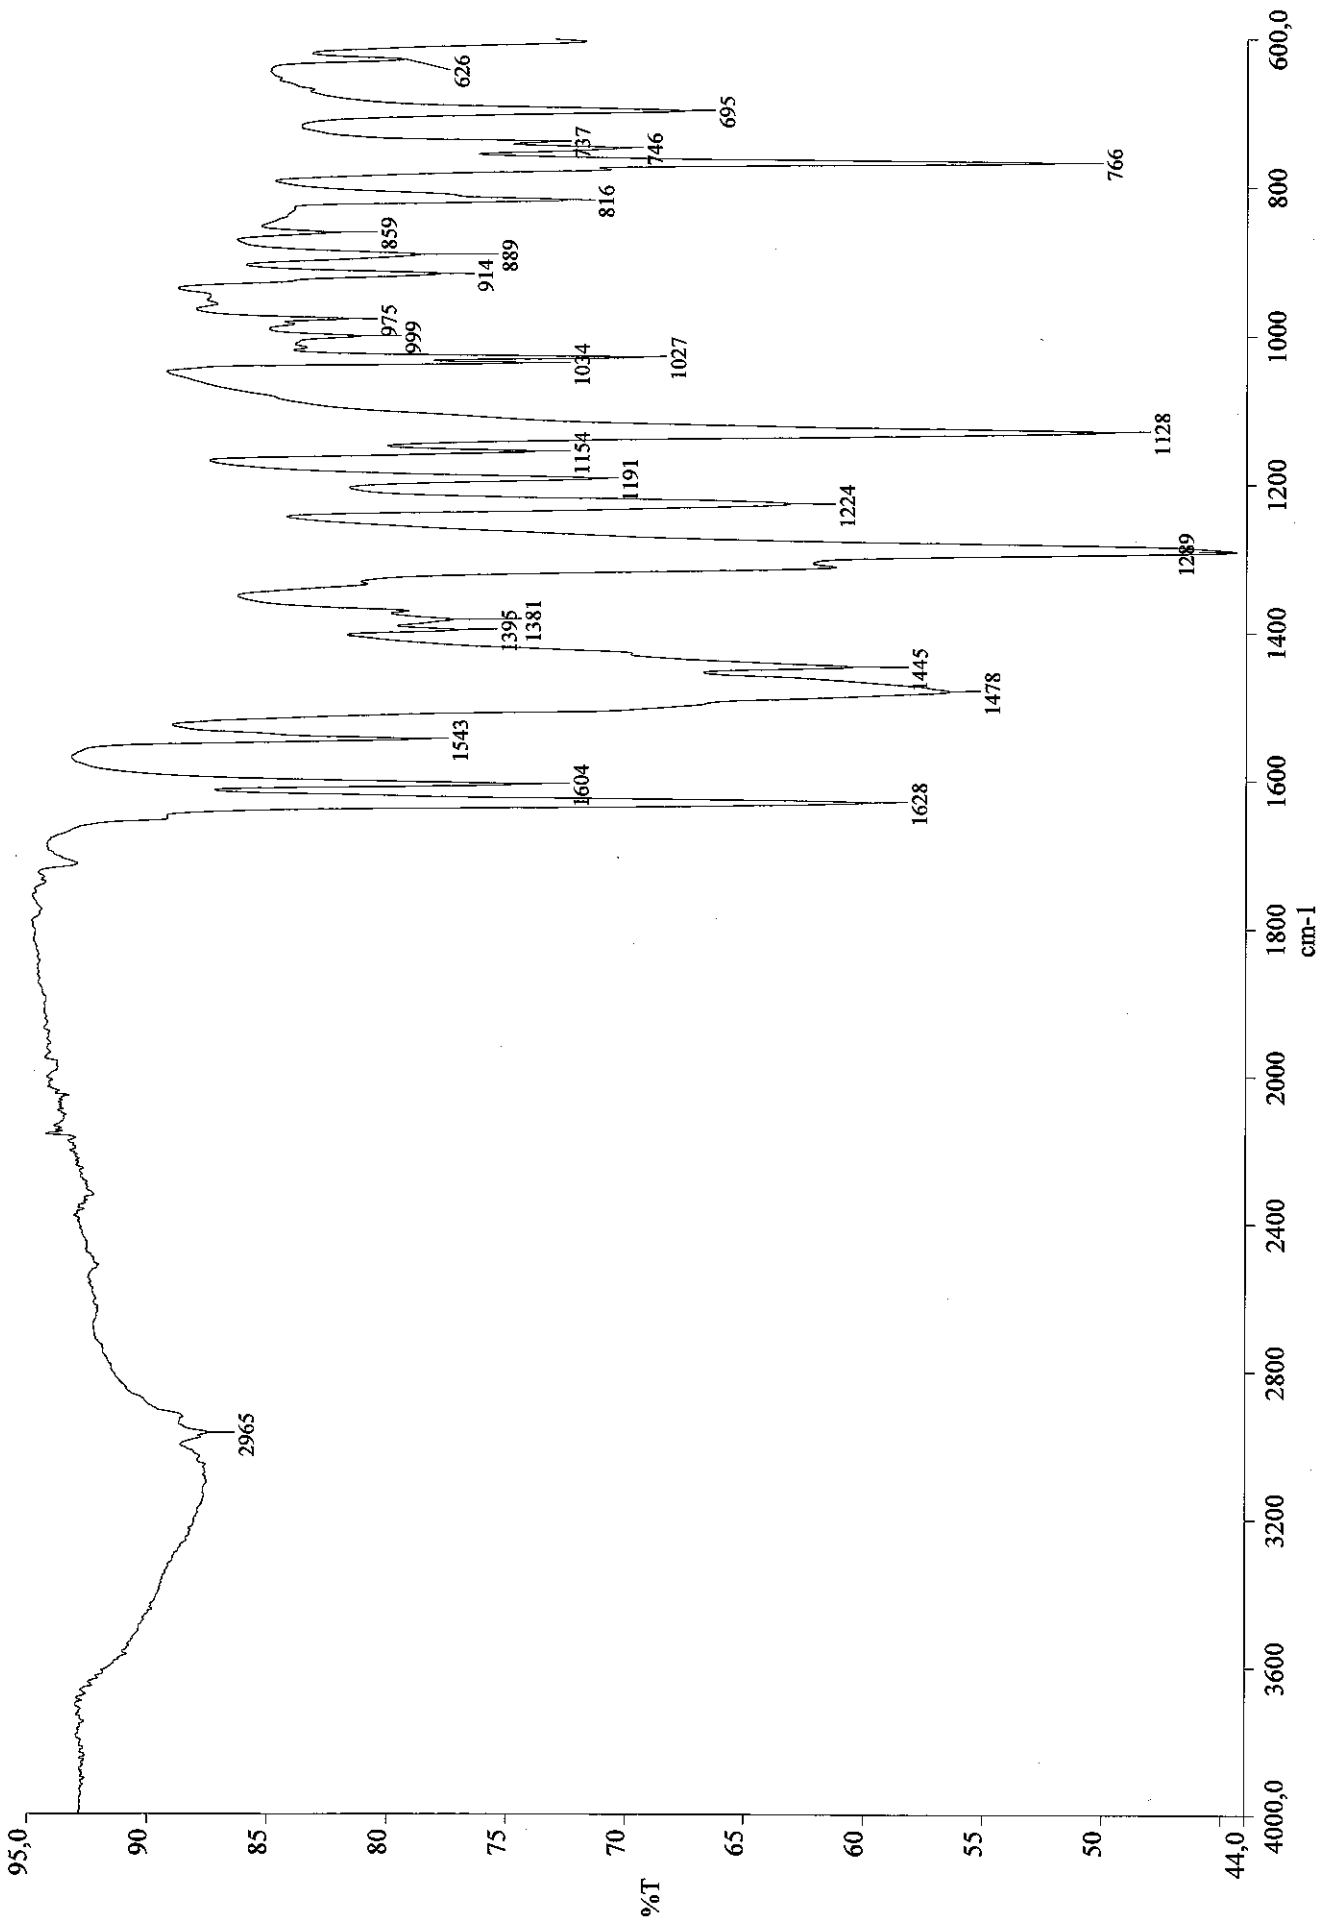

e:\cclequipe\scostes\1100913.sp - [(LCu)2Ho(NO3)3(H2O)]

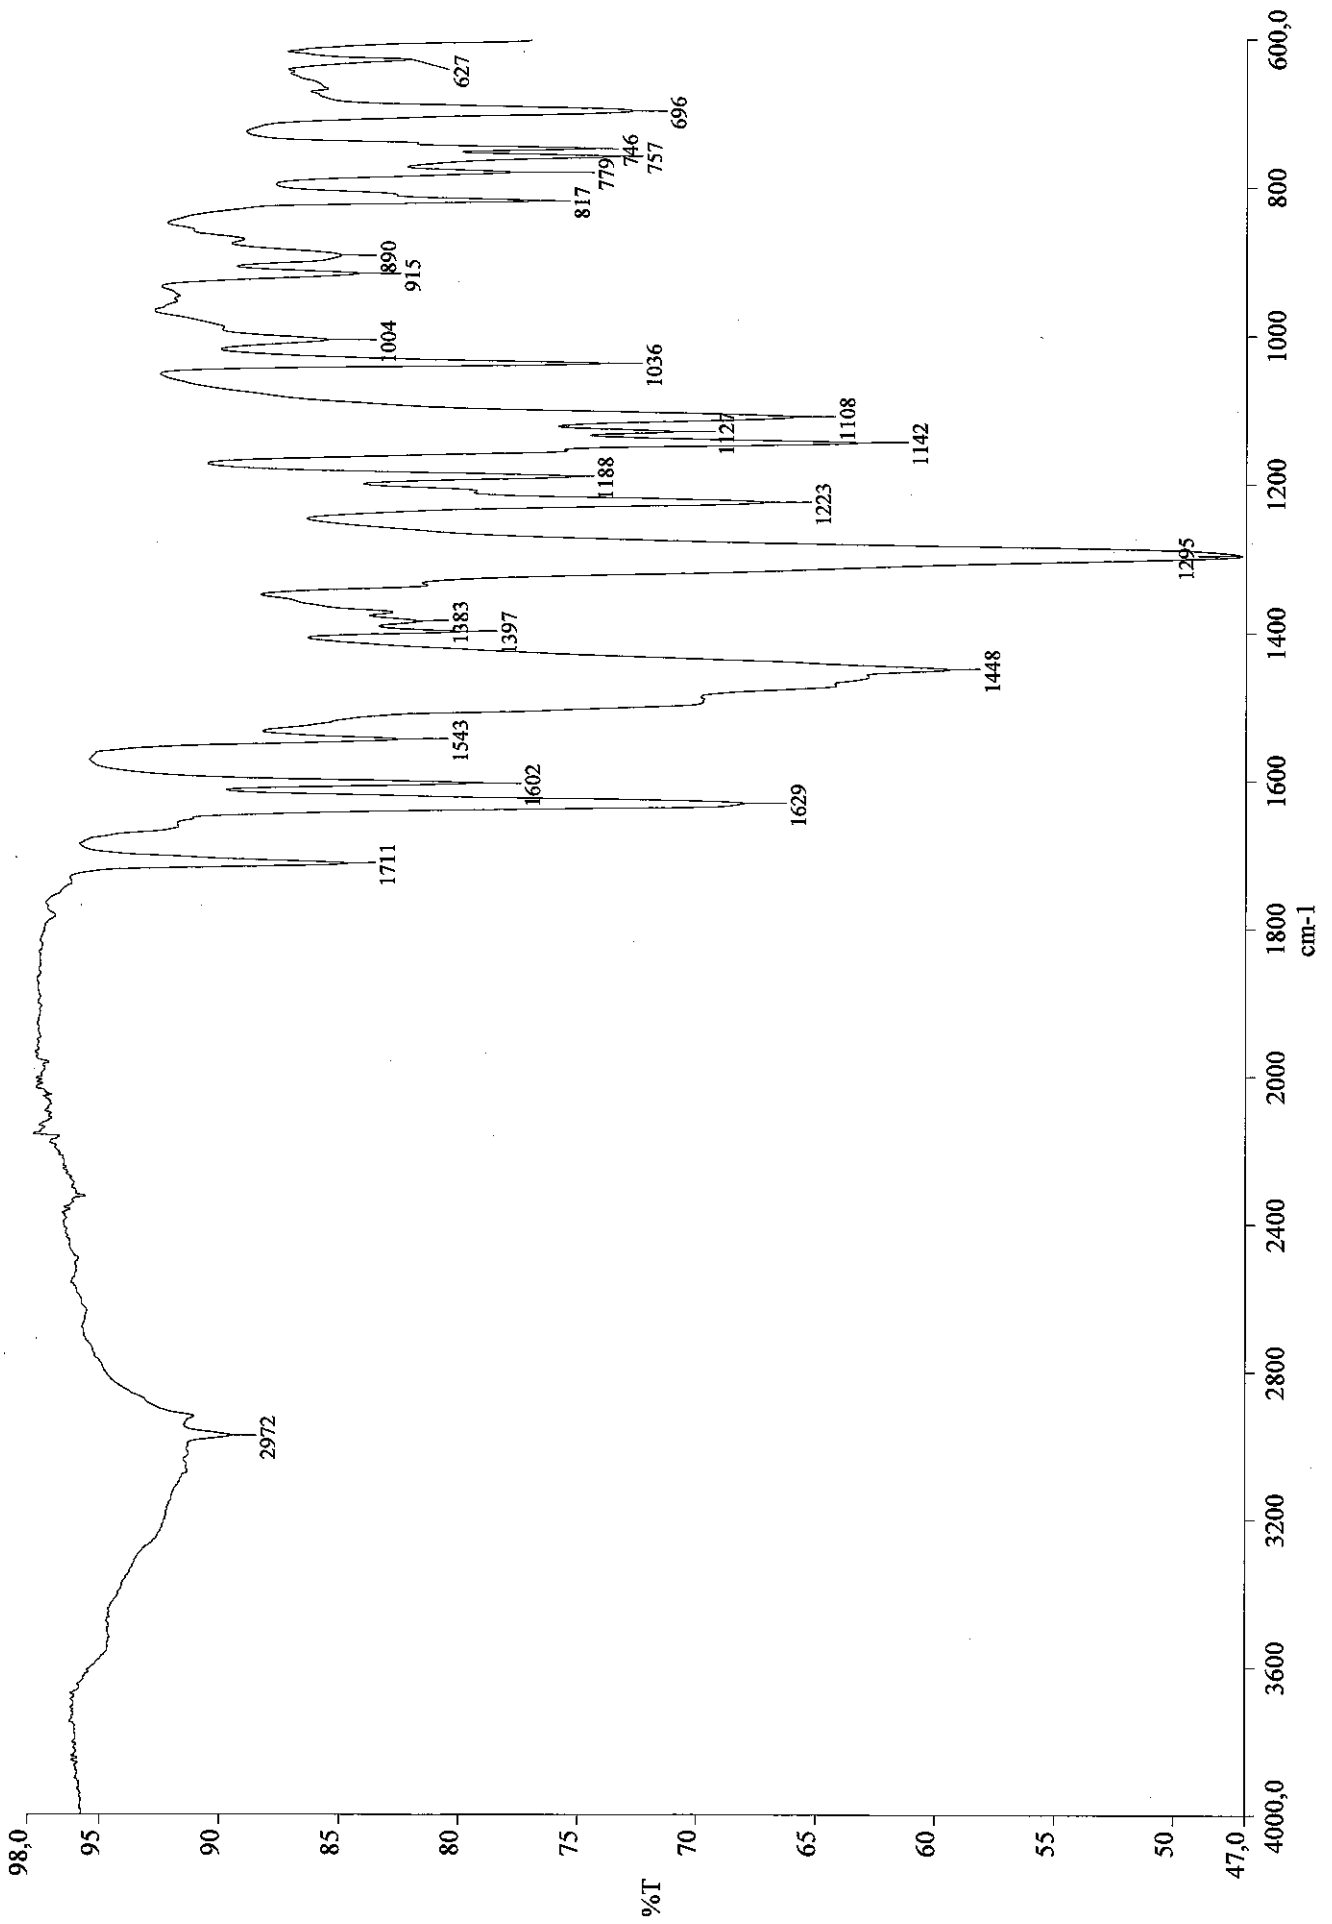

e:\lcclequipe stcostes\3130312.sp - [(LCu)2Y(NO3)3(H2O)]

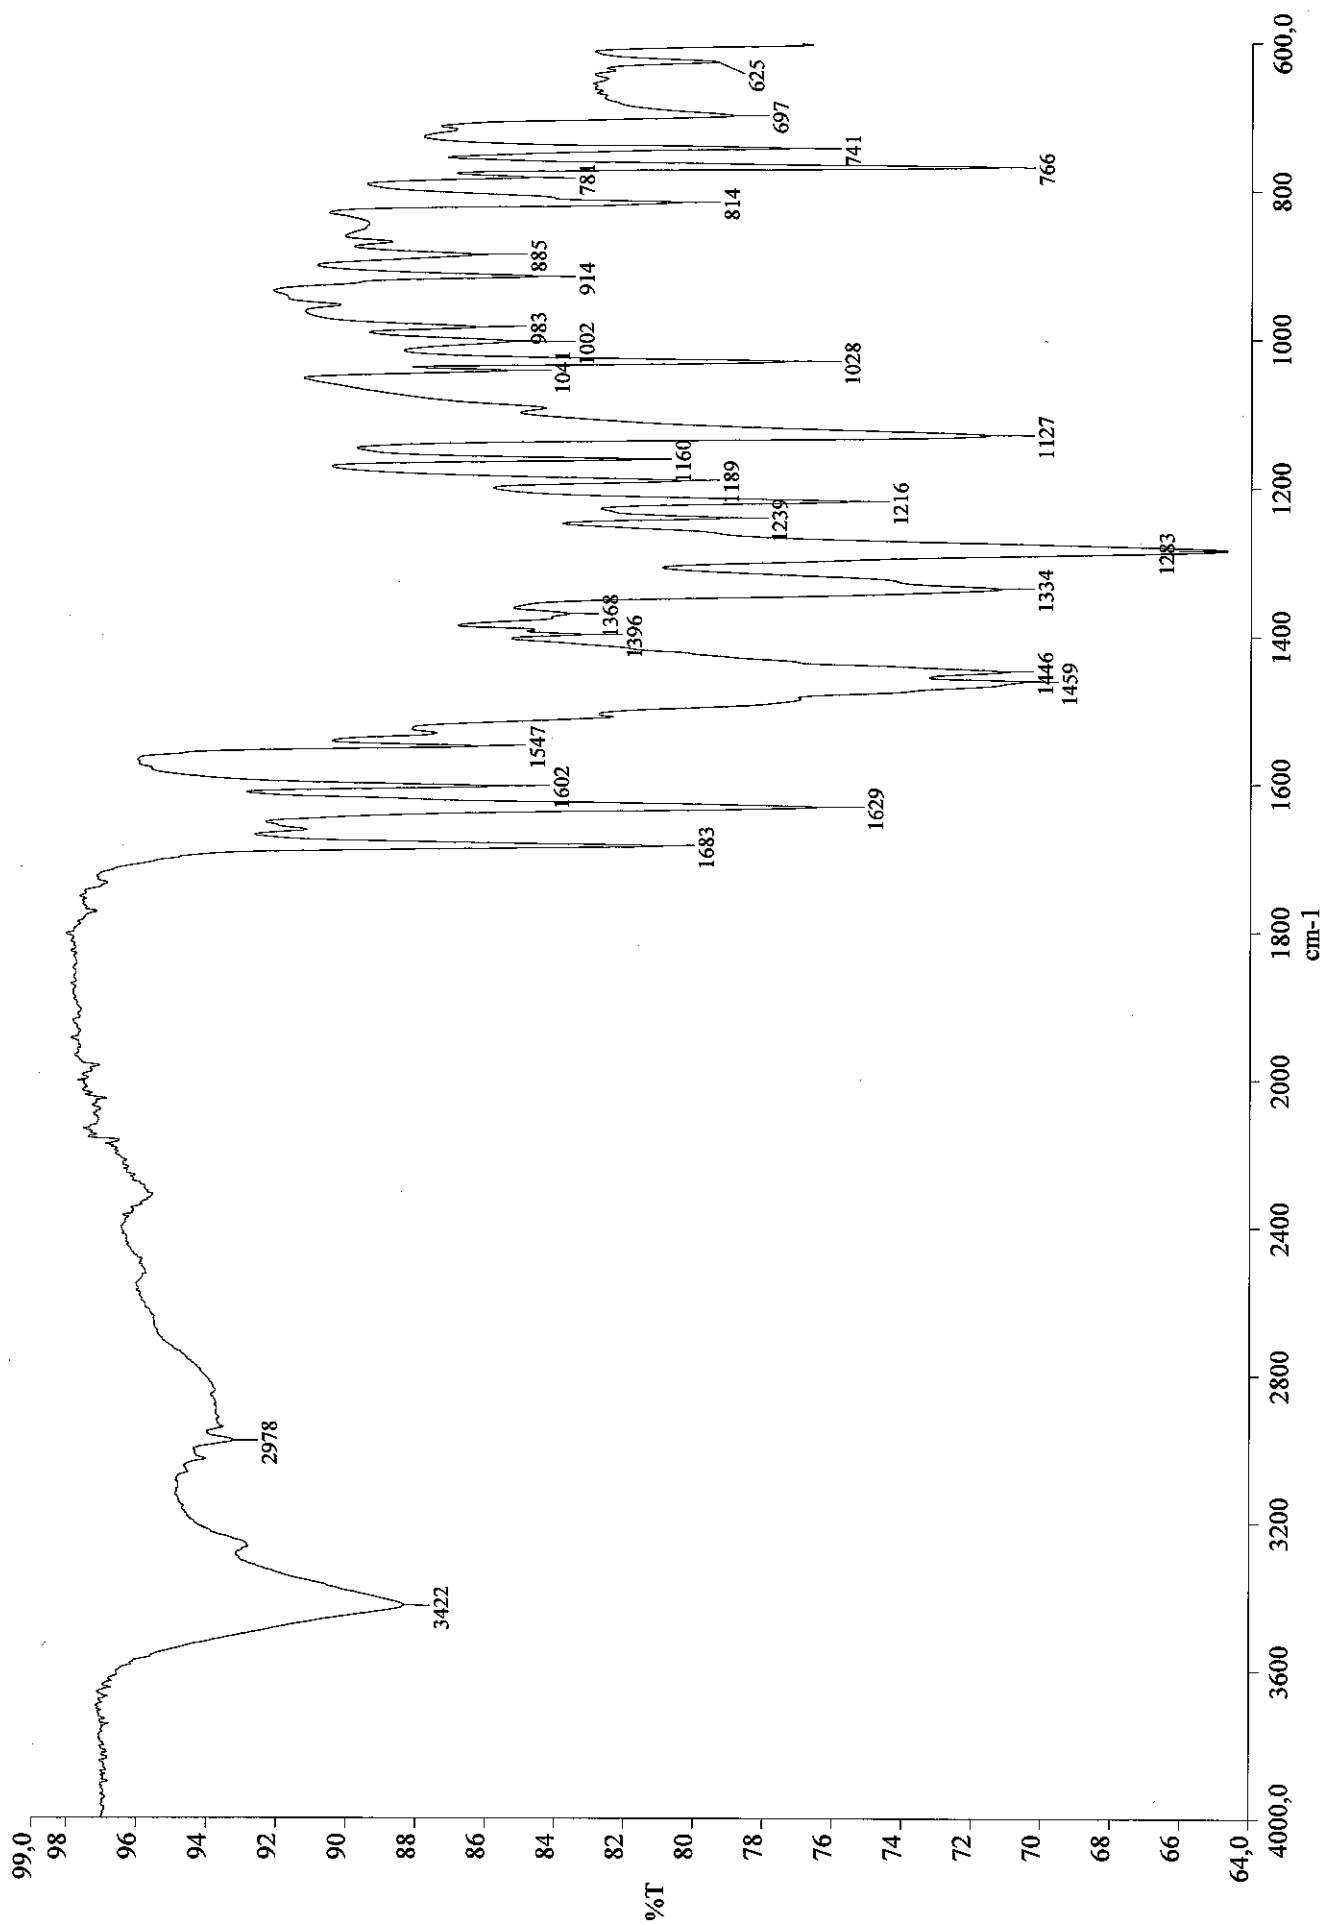

e:\lcc\equipe stcostes\5130312.sp - [LCu]Ho(NO3)3(H2O)2(C3H6O)]

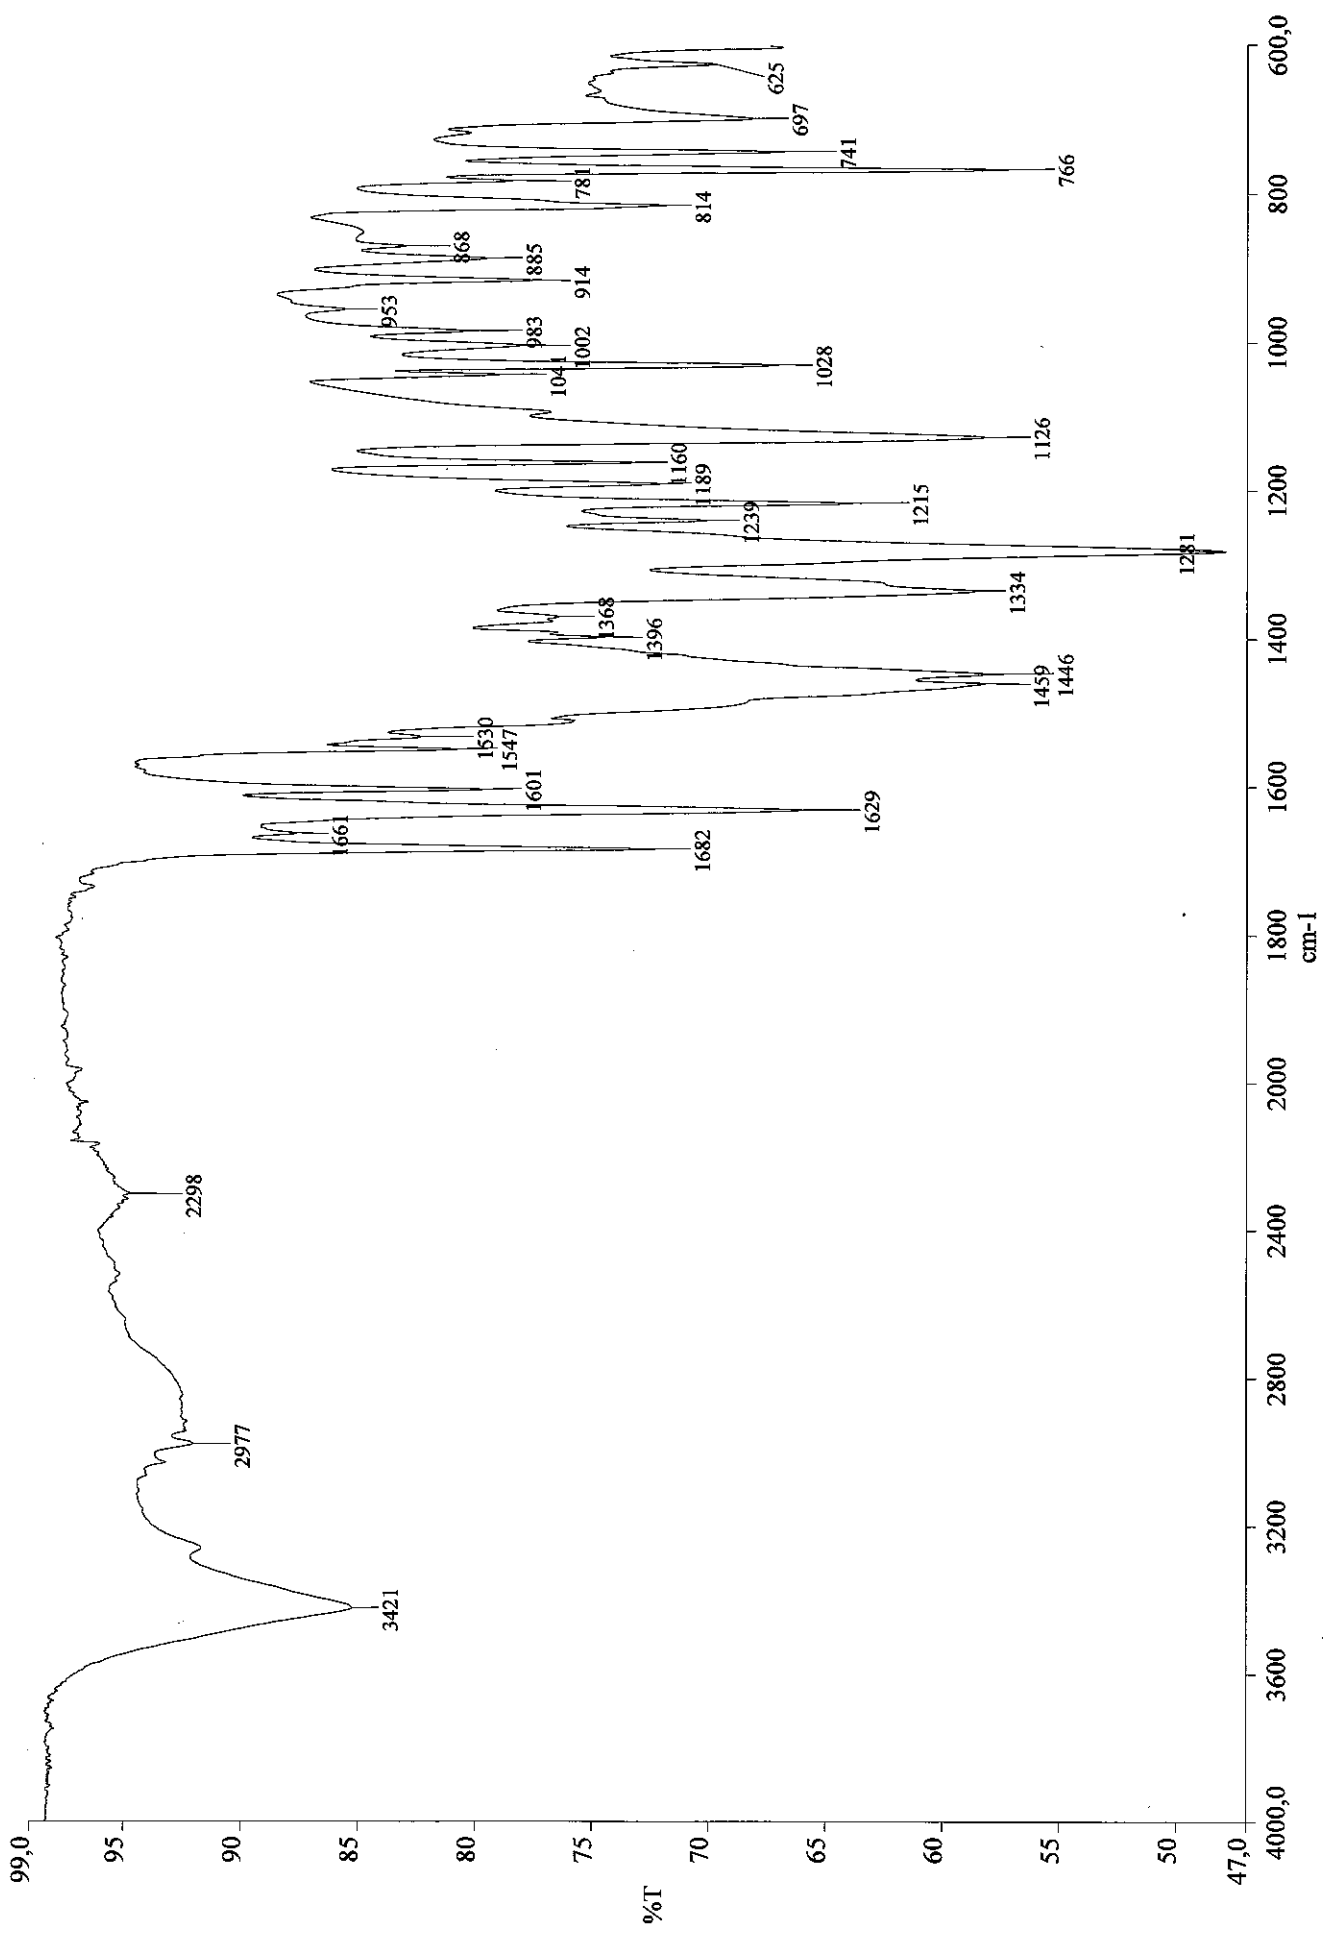

e:\cclequipe s\costes\1300909.sp - [(L-Cu)Er(NO3)3(H2O)2(C3H6O)]

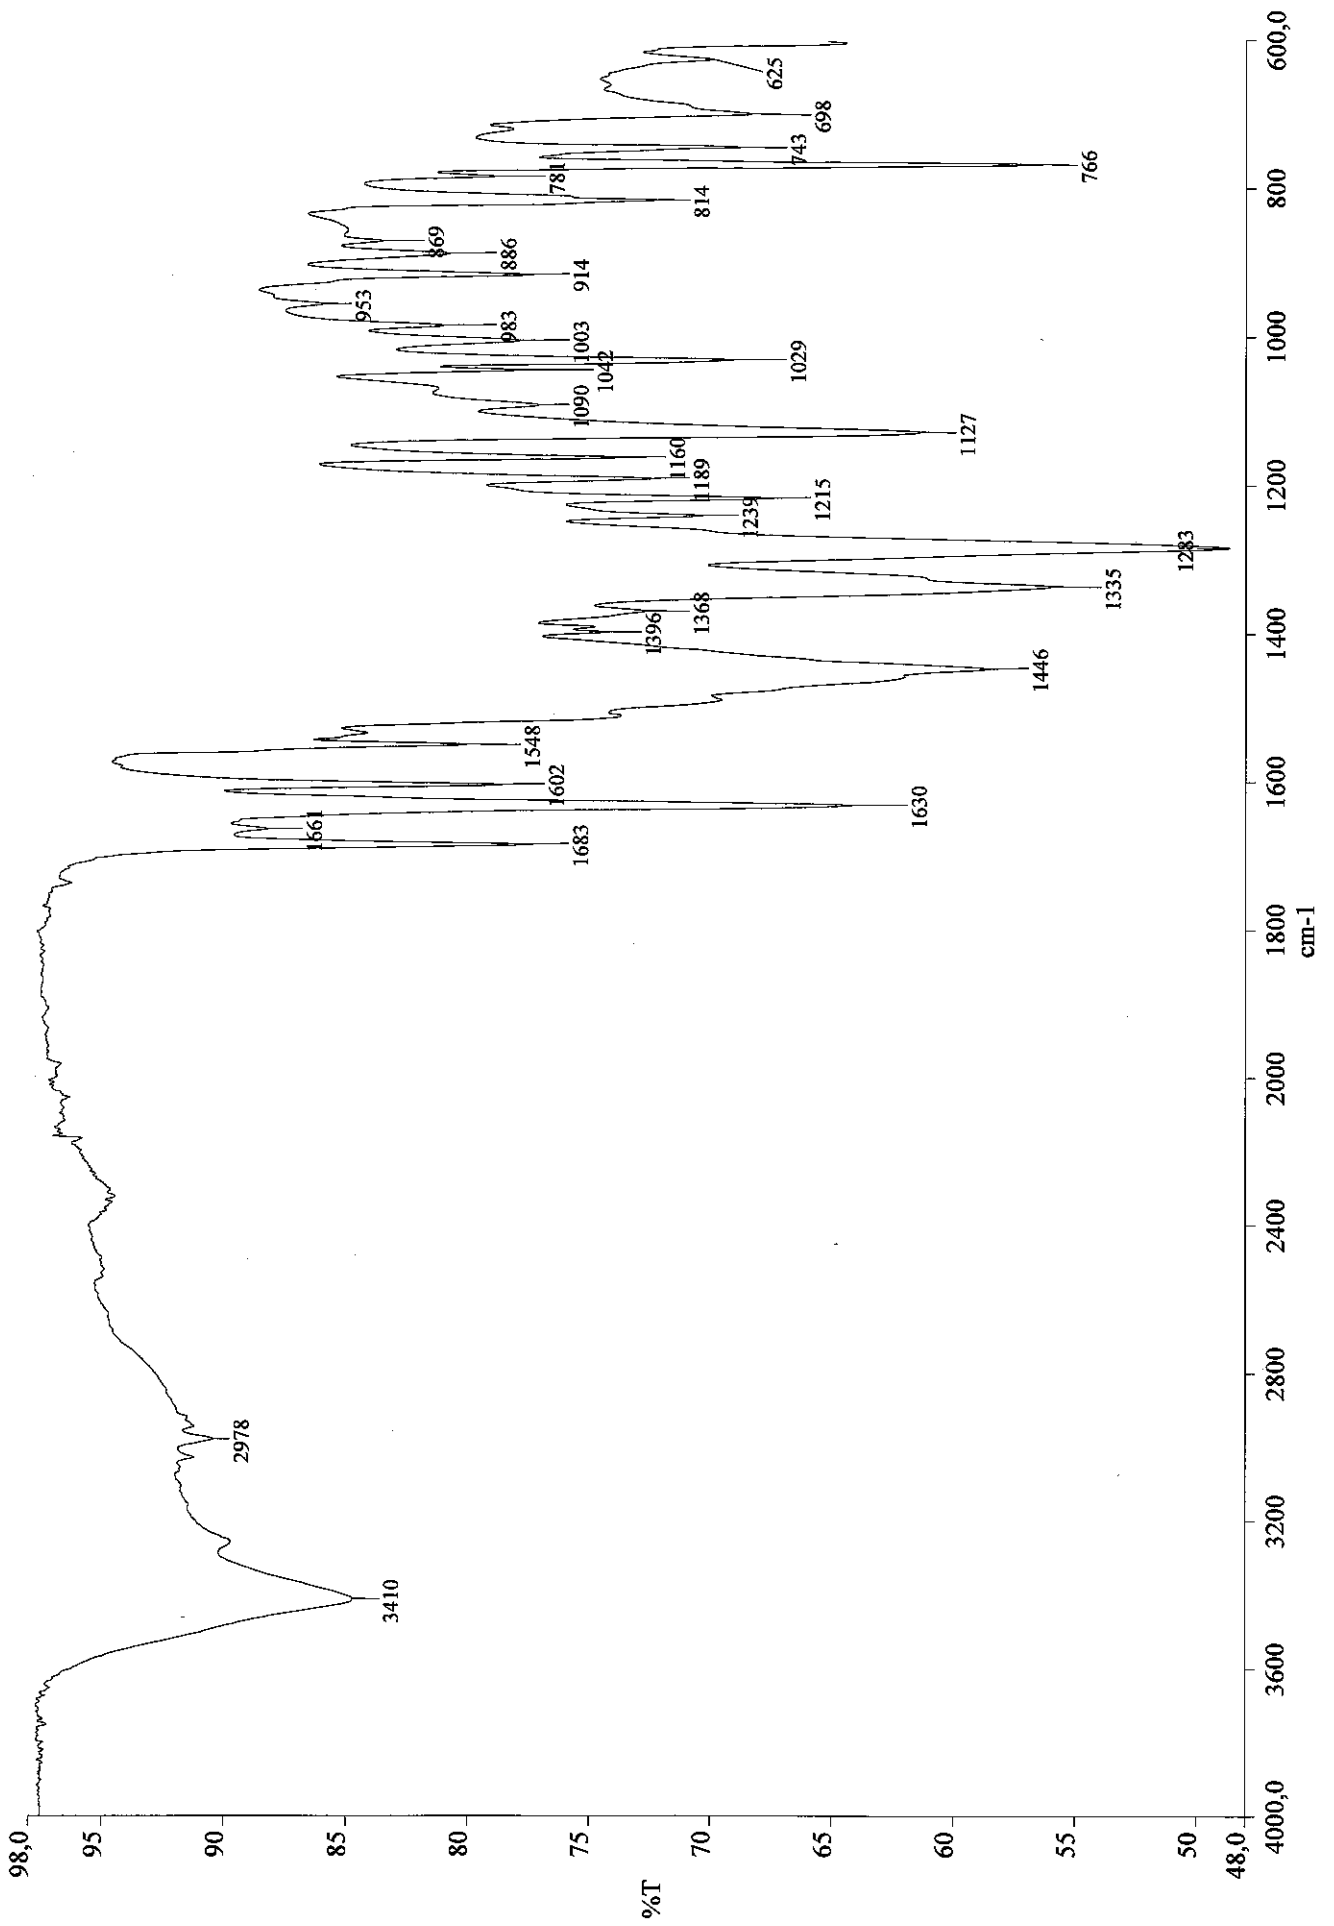

e:\lcclequipe\lcosfes\30505.sp - [(LCu)Yb(NO3)3(H2O)2(C3H6O)]
